# Supplementary material
Source: publisher figshare collection journal article supplement (https://acs.figshare.com/ndownloader/files/23775223)
Supplement: Supplementary file 1 [file 23775223]

## Supporting Information

### Efficient Arylation of 2,7-Naphthyridin-1(2H)-one with Diaryliodonium Salts and

### Discovery of New Selective MET/AXL Kinase Inhibitor

Ming-Shu Wang<sup>1,†</sup>, Hong-Chuang Xu<sup>1,†</sup>, Yi Gong<sup>1,†</sup>, Ren-Yu Qu<sup>1</sup>, Lin-Sheng Zhuo<sup>1,\*</sup>, and Wei Huang<sup>1,\*</sup>

<sup>1</sup>Key Laboratory of Pesticide & Chemical Biology of Ministry of Education, International Joint Research Center for Intelligent Biosensor Technology and Health, College of Chemistry, Central China Normal University, Wuhan 430079, P.R. China

E-mail: [zhuolinsheng199010@126.com](mailto:zhuolinsheng199010@126.com) (L.Z.), [weihuangwuhan@126.com](mailto:weihuangwuhan@126.com) (W.H.).

| List of Contents                                                                                            | Page |
|-------------------------------------------------------------------------------------------------------------|------|
| ● Figure S1: 400 MHz spectrum of <sup>1</sup> H-NMR of compound <b>10a</b> (DMSO- <i>d</i> <sub>6</sub> )   | S3   |
| ● Figure S2: 100 MHz spectrum of <sup>13</sup> C-NMR of compound <b>10a</b> (DMSO- <i>d</i> <sub>6</sub> )  | S3   |
| ● Figure S3: 600 MHz spectrum of <sup>1</sup> H-NMR of compound <b>10b</b> (DMSO- <i>d</i> <sub>6</sub> )   | S4   |
| ● Figure S4: 100 MHz spectrum of <sup>13</sup> C-NMR of compound <b>10b</b> (DMSO- <i>d</i> <sub>6</sub> )  | S4   |
| ● Figure S5: 600 MHz spectrum of <sup>1</sup> H-NMR of compound <b>10c</b> (DMSO- <i>d</i> <sub>6</sub> )   | S5   |
| ● Figure S6: 100 MHz spectrum of <sup>13</sup> C-NMR of compound <b>10c</b> (DMSO- <i>d</i> <sub>6</sub> )  | S5   |
| ● Figure S7: 400 MHz spectrum of <sup>1</sup> H-NMR of compound <b>10d</b> (DMSO- <i>d</i> <sub>6</sub> )   | S6   |
| ● Figure S8: 100 MHz spectrum of <sup>13</sup> C-NMR of compound <b>10d</b> (DMSO- <i>d</i> <sub>6</sub> )  | S6   |
| ● Figure S9: 600 MHz spectrum of <sup>1</sup> H-NMR of compound <b>10e</b> (DMSO- <i>d</i> <sub>6</sub> )   | S7   |
| ● Figure S10: 100 MHz spectrum of <sup>13</sup> C-NMR of compound <b>10e</b> (DMSO- <i>d</i> <sub>6</sub> ) | S7   |
| ● Figure S11: 600 MHz spectrum of <sup>1</sup> H-NMR of compound <b>10f</b> (DMSO- <i>d</i> <sub>6</sub> )  | S8   |
| ● Figure S12: 100 MHz spectrum of <sup>13</sup> C-NMR of compound <b>10f</b> (DMSO- <i>d</i> <sub>6</sub> ) | S8   |
| ● Figure S13: 600 MHz spectrum of <sup>1</sup> H-NMR of compound <b>10g</b> (DMSO- <i>d</i> <sub>6</sub> )  | S9   |
| ● Figure S14: 100 MHz spectrum of <sup>13</sup> C-NMR of compound <b>10g</b> (DMSO- <i>d</i> <sub>6</sub> ) | S9   |
| ● Figure S15: 600 MHz spectrum of <sup>1</sup> H-NMR of compound <b>10h</b> (DMSO- <i>d</i> <sub>6</sub> )  | S10  |
| ● Figure S16: 100 MHz spectrum of <sup>13</sup> C-NMR of compound <b>10h</b> (DMSO- <i>d</i> <sub>6</sub> ) | S10  |
| ● Figure S17: 600 MHz spectrum of <sup>1</sup> H-NMR of compound <b>10i</b> (DMSO- <i>d</i> <sub>6</sub> )  | S11  |
| ● Figure S18: 100 MHz spectrum of <sup>13</sup> C-NMR of compound <b>10i</b> (DMSO- <i>d</i> <sub>6</sub> ) | S11  |
| ● Figure S19: 600 MHz spectrum of <sup>1</sup> H-NMR of compound <b>10j</b> (DMSO- <i>d</i> <sub>6</sub> )  | S12  |
| ● Figure S20: 100 MHz spectrum of <sup>13</sup> C-NMR of compound <b>10j</b> (DMSO- <i>d</i> <sub>6</sub> ) | S12  |
| ● Figure S21: 600 MHz spectrum of <sup>1</sup> H-NMR of compound <b>10k</b> (DMSO- <i>d</i> <sub>6</sub> )  | S13  |
| ● Figure S22: 100 MHz spectrum of <sup>13</sup> C-NMR of compound <b>10k</b> (DMSO- <i>d</i> <sub>6</sub> ) | S13  |

|                                                                                              |     |
|----------------------------------------------------------------------------------------------|-----|
| ● Figure S23: 600 MHz spectrum of $^1\text{H}$ -NMR of compound <b>10l</b> (DMSO- $d_6$ )    | S14 |
| ● Figure S24: 100 MHz spectrum of $^{13}\text{C}$ -NMR of compound <b>10l</b> (DMSO- $d_6$ ) | S14 |
| ● Figure S25: 400 MHz spectrum of $^1\text{H}$ -NMR of compound <b>10m</b> (DMSO- $d_6$ )    | S15 |
| ● Figure S26: 100 MHz spectrum of $^{13}\text{C}$ -NMR of compound <b>10m</b> (DMSO- $d_6$ ) | S15 |
| ● Figure S27: 600 MHz spectrum of $^1\text{H}$ -NMR of compound <b>10n</b> (DMSO- $d_6$ )    | S16 |
| ● Figure S28: 100 MHz spectrum of $^{13}\text{C}$ -NMR of compound <b>10n</b> (DMSO- $d_6$ ) | S16 |
| ● Figure S29: 600 MHz spectrum of $^1\text{H}$ -NMR of compound <b>10o</b> (DMSO- $d_6$ )    | S17 |
| ● Figure S30: 100 MHz spectrum of $^{13}\text{C}$ -NMR of compound <b>10o</b> (DMSO- $d_6$ ) | S17 |
| ● Figure S31: 400 MHz spectrum of $^1\text{H}$ -NMR of compound <b>17a</b> (DMSO- $d_6$ )    | S18 |
| ● Figure S32: 100 MHz spectrum of $^{13}\text{C}$ -NMR of compound <b>17a</b> (DMSO- $d_6$ ) | S18 |
| ● Figure S33: 400 MHz spectrum of $^1\text{H}$ -NMR of compound <b>17b</b> (DMSO- $d_6$ )    | S19 |
| ● Figure S34: 100 MHz spectrum of $^{13}\text{C}$ -NMR of compound <b>17b</b> (DMSO- $d_6$ ) | S19 |
| ● Figure S35: 400 MHz spectrum of $^1\text{H}$ -NMR of compound <b>17c</b> (DMSO- $d_6$ )    | S20 |
| ● Figure S36: 100 MHz spectrum of $^{13}\text{C}$ -NMR of compound <b>17c</b> (DMSO- $d_6$ ) | S20 |
| ● Figure S37: 400 MHz spectrum of $^1\text{H}$ -NMR of compound <b>17d</b> (DMSO- $d_6$ )    | S21 |
| ● Figure S38: 100 MHz spectrum of $^{13}\text{C}$ -NMR of compound <b>17d</b> (DMSO- $d_6$ ) | S21 |
| ● Figure S39: 400 MHz spectrum of $^1\text{H}$ -NMR of compound <b>17e</b> (DMSO- $d_6$ )    | S22 |
| ● Figure S40: 100 MHz spectrum of $^{13}\text{C}$ -NMR of compound <b>17e</b> (DMSO- $d_6$ ) | S22 |
| ● Figure S41: 600 MHz spectrum of $^1\text{H}$ -NMR of compound <b>17f</b> (DMSO- $d_6$ )    | S23 |
| ● Figure S42: 100 MHz spectrum of $^{13}\text{C}$ -NMR of compound <b>17f</b> (DMSO- $d_6$ ) | S23 |
| ● Figure S43: 600 MHz spectrum of $^1\text{H}$ -NMR of compound <b>17g</b> (DMSO- $d_6$ )    | S24 |
| ● Figure S44: 100 MHz spectrum of $^{13}\text{C}$ -NMR of compound <b>17g</b> (DMSO- $d_6$ ) | S24 |
| ● Figure S45: 400 MHz spectrum of $^1\text{H}$ -NMR of compound <b>17h</b> (DMSO- $d_6$ )    | S25 |
| ● Figure S46: 100 MHz spectrum of $^{13}\text{C}$ -NMR of compound <b>17h</b> (DMSO- $d_6$ ) | S25 |
| ● Figure S47: 400 MHz spectrum of $^1\text{H}$ -NMR of compound <b>17i</b> (DMSO- $d_6$ )    | S26 |
| ● Figure S48: 100 MHz spectrum of $^{13}\text{C}$ -NMR of compound <b>17i</b> (DMSO- $d_6$ ) | S26 |
| ● Figure S49: 400 MHz spectrum of $^1\text{H}$ -NMR of compound <b>17j</b> (DMSO- $d_6$ )    | S27 |
| ● Figure S50: 100 MHz spectrum of $^{13}\text{C}$ -NMR of compound <b>17j</b> (DMSO- $d_6$ ) | S27 |
| ● Figure S51: 400 MHz spectrum of $^1\text{H}$ -NMR of compound <b>17k</b> (DMSO- $d_6$ )    | S28 |
| ● Figure S52: 100 MHz spectrum of $^{13}\text{C}$ -NMR of compound <b>17k</b> (DMSO- $d_6$ ) | S28 |

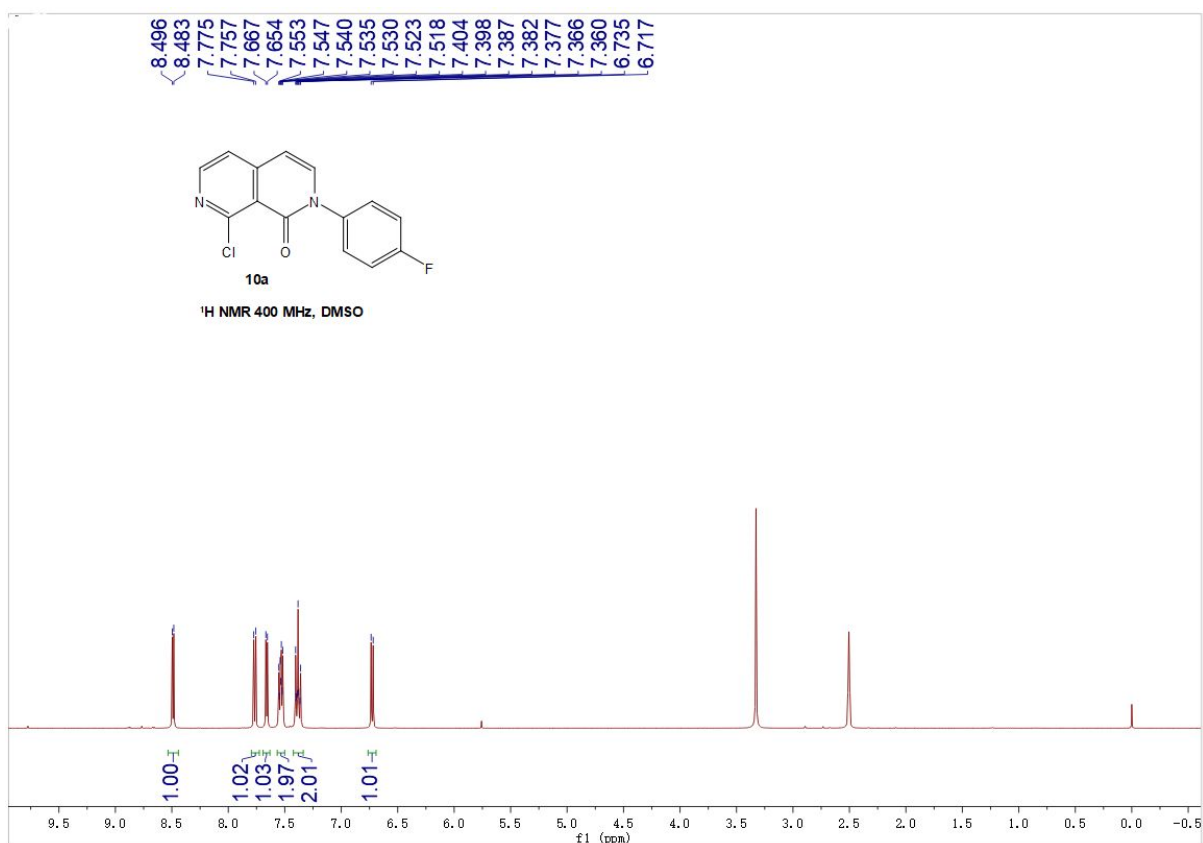

Figure S1: 400 MHz spectrum of <sup>1</sup>H-NMR of compound **10a** (DMSO-*d*<sub>6</sub>)

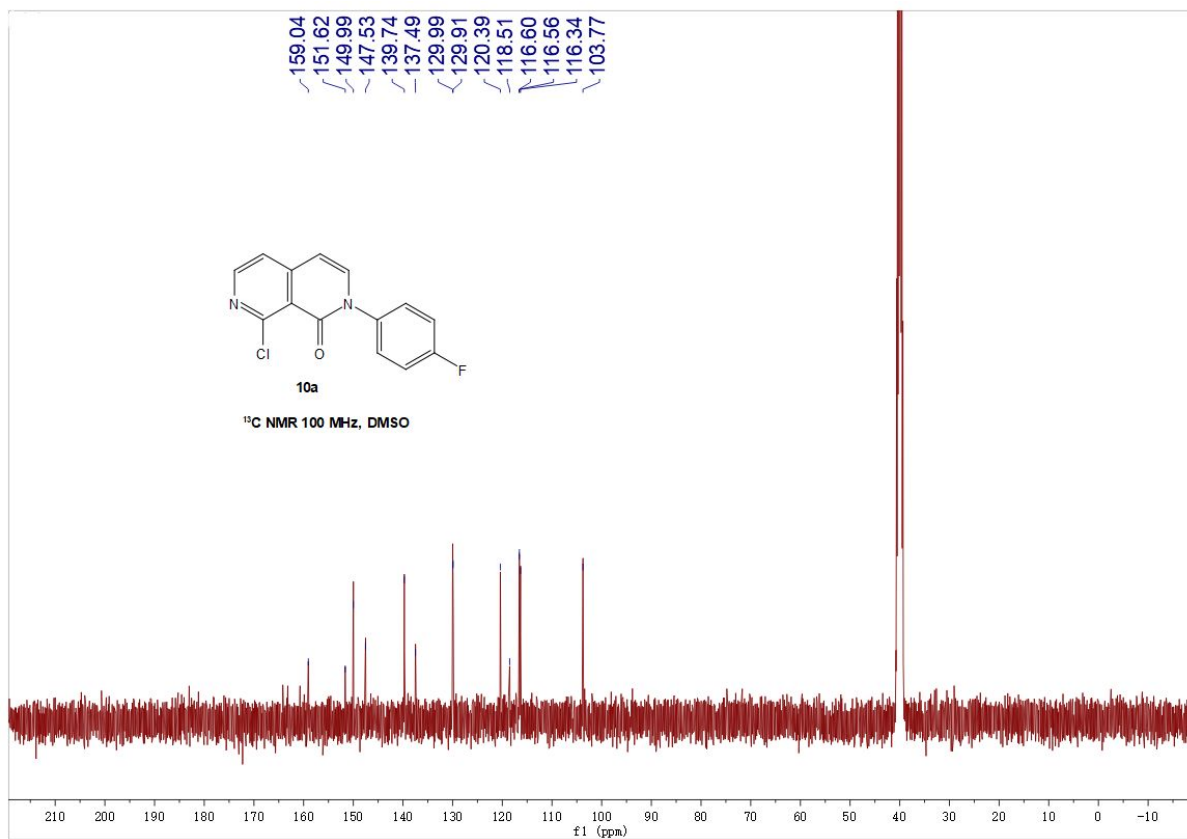

Figure S2: 100 MHz spectrum of <sup>13</sup>C-NMR of compound **10a** (DMSO-*d*<sub>6</sub>)

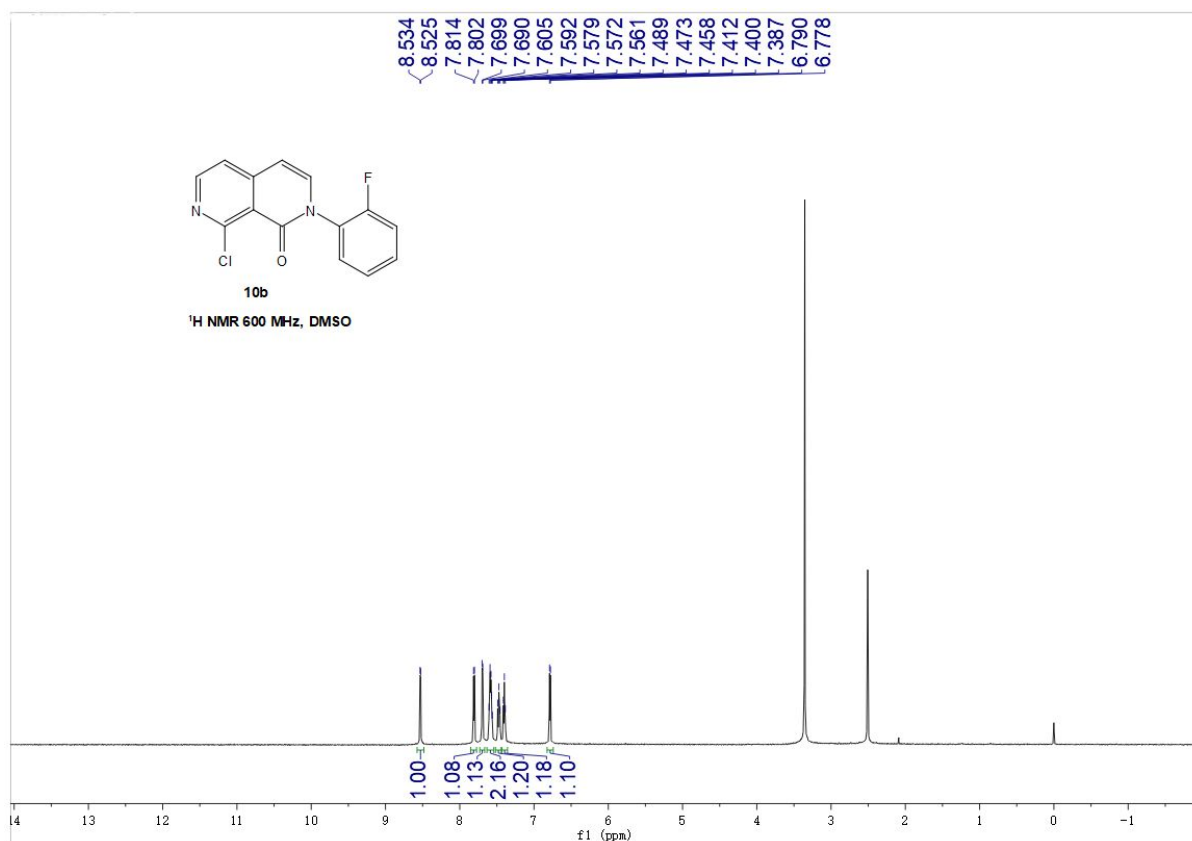

Figure S3: 600 MHz spectrum of <sup>1</sup>H-NMR of compound **10b** (DMSO-*d*<sub>6</sub>)

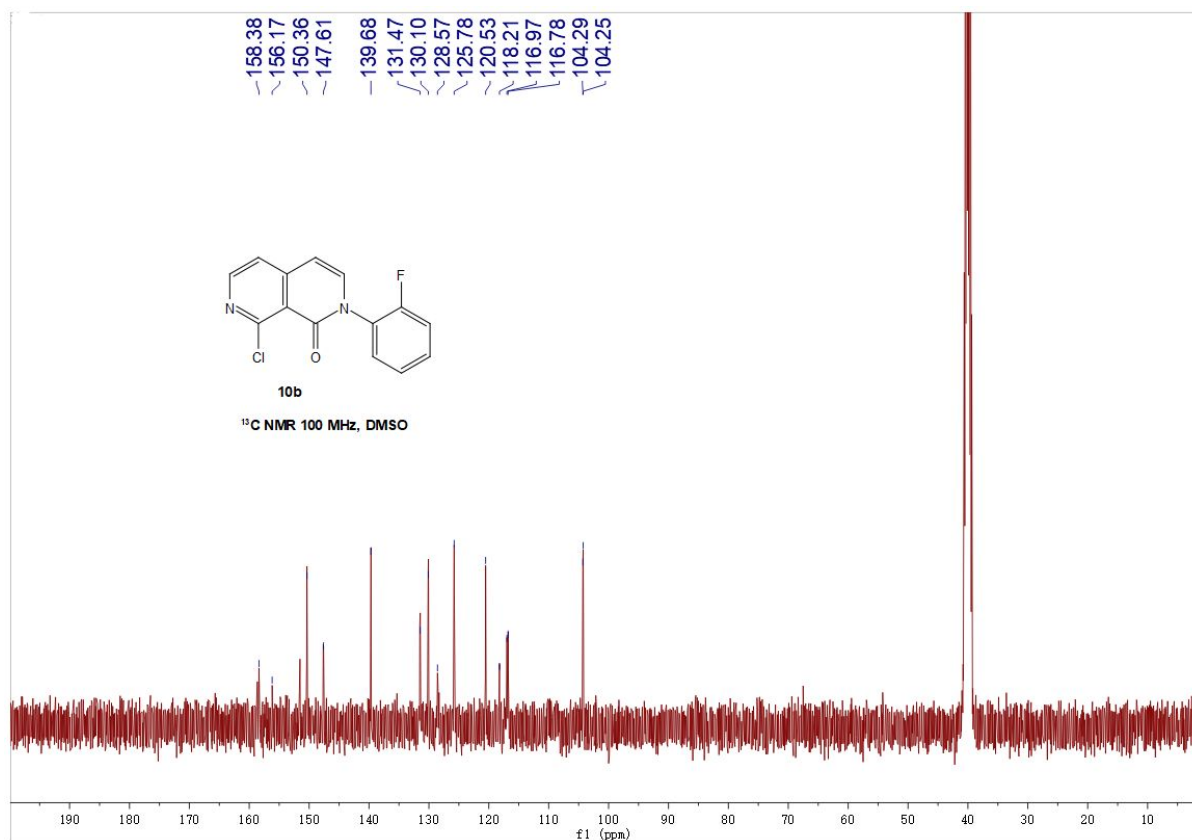

Figure S4: 100 MHz spectrum of <sup>13</sup>C-NMR of compound **10b** (DMSO-*d*<sub>6</sub>)

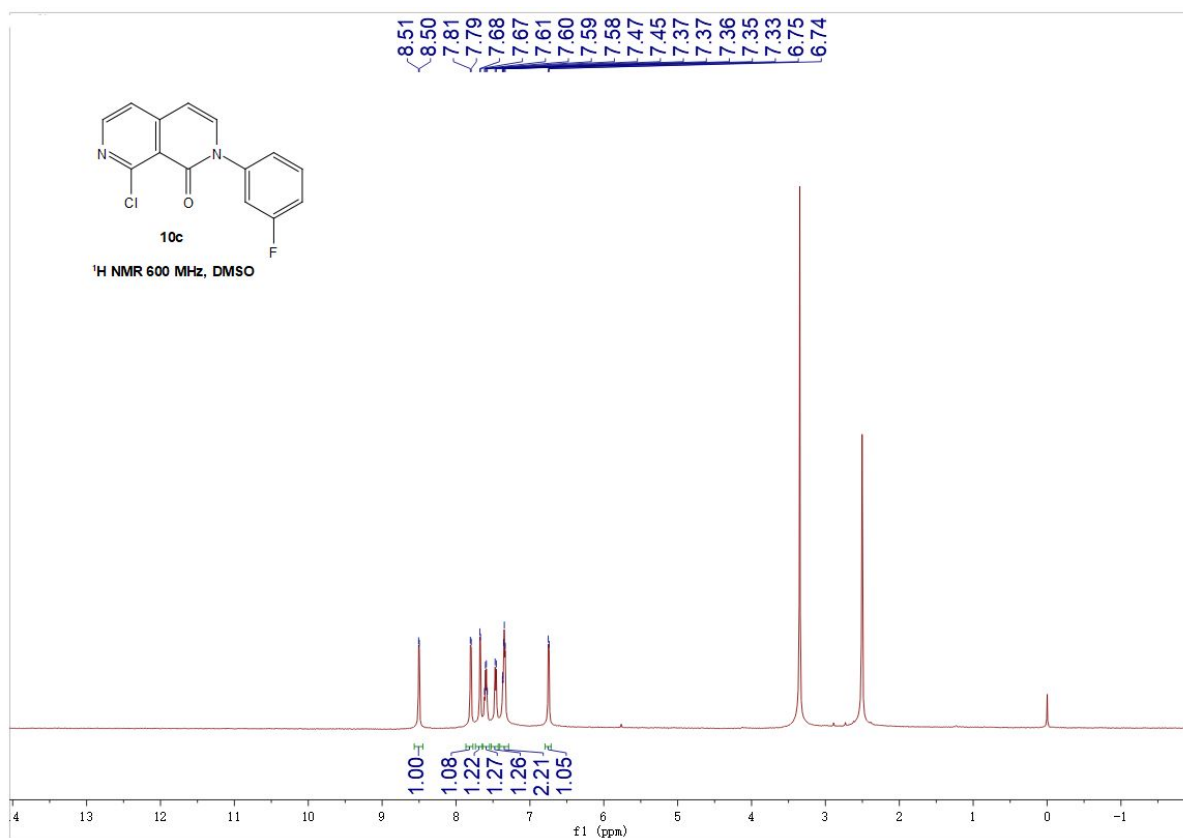

Figure S5: 600 MHz spectrum of <sup>1</sup>H-NMR of compound **10c** (DMSO-*d*<sub>6</sub>)

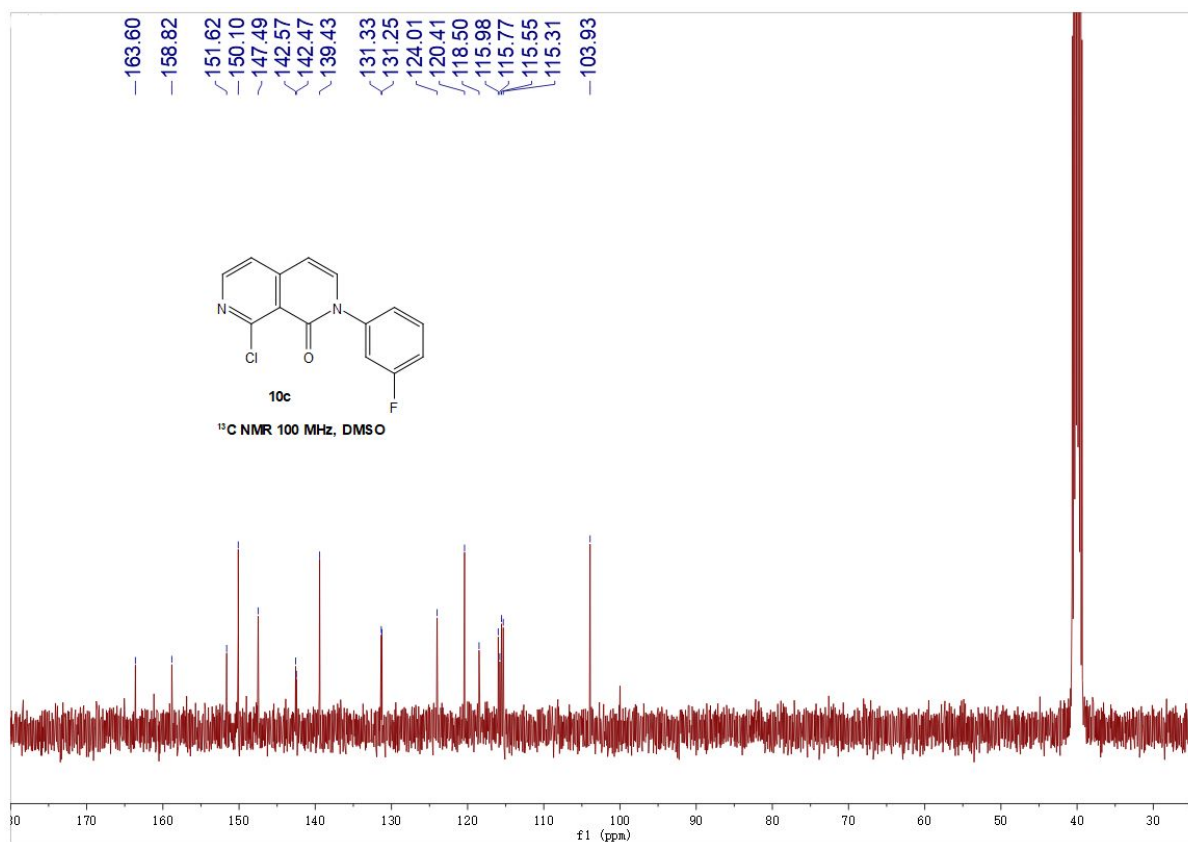

Figure S6: 100 MHz spectrum of <sup>13</sup>C-NMR of compound **10c** (DMSO-*d*<sub>6</sub>)

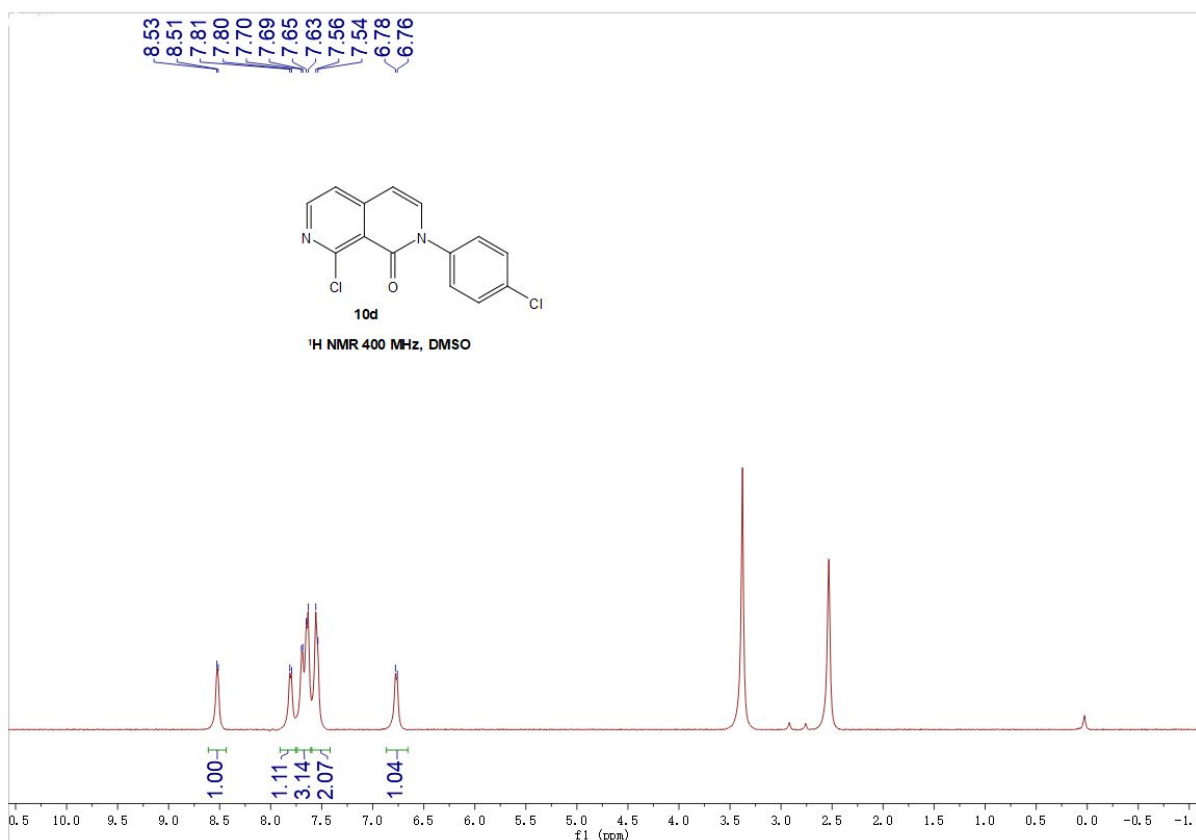

Figure S7: 400 MHz spectrum of <sup>1</sup>H-NMR of compound **10d** (DMSO-*d*<sub>6</sub>)

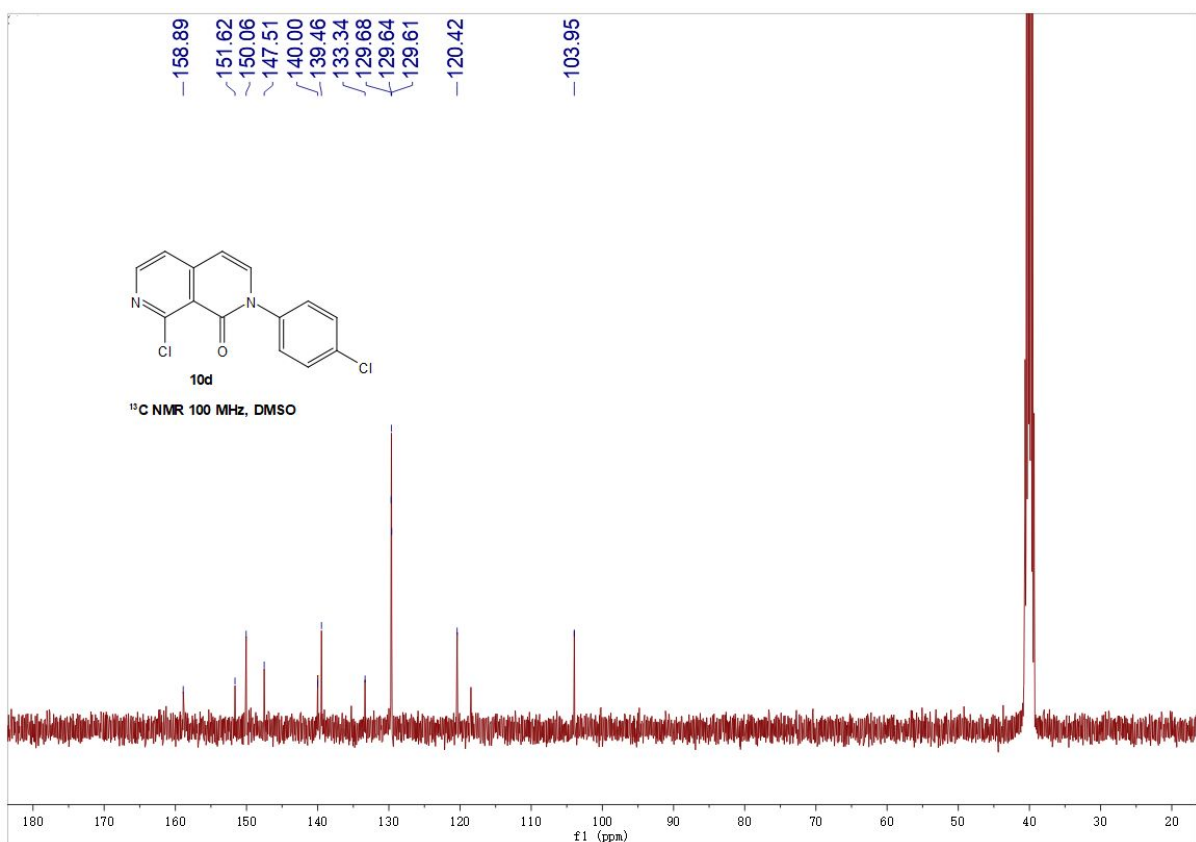

Figure S8: 100 MHz spectrum of <sup>13</sup>C-NMR of compound **10d** (DMSO-*d*<sub>6</sub>)

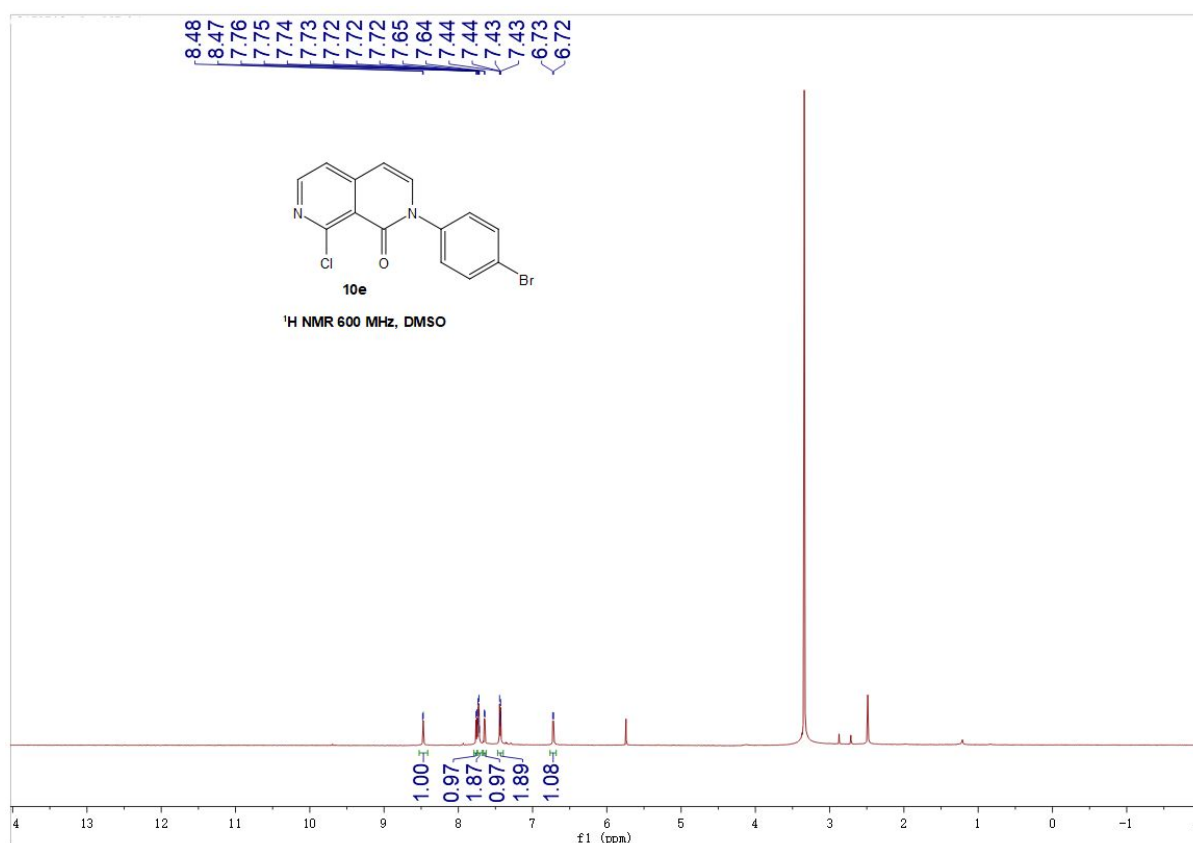

Figure S9: 600 MHz spectrum of <sup>1</sup>H-NMR of compound **10e** (DMSO-*d*<sub>6</sub>)

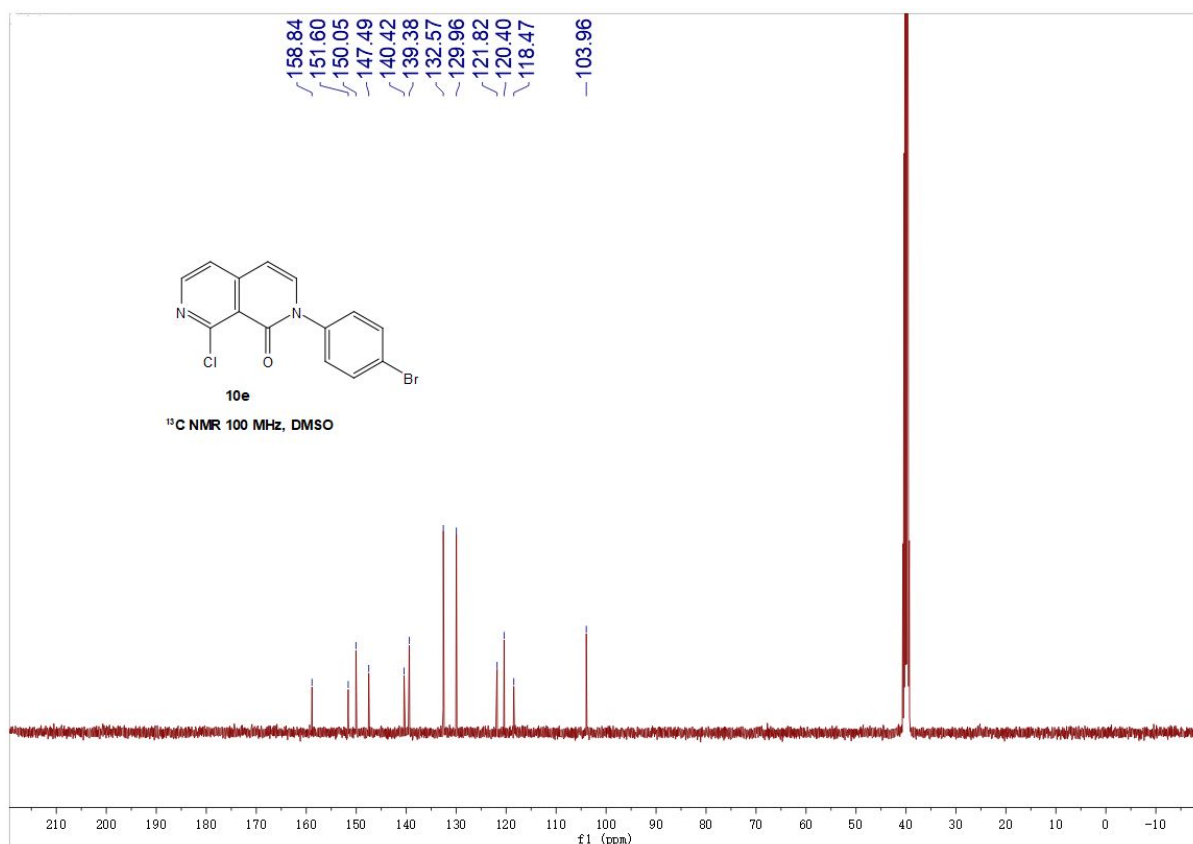

Figure S10: 100 MHz spectrum of <sup>13</sup>C-NMR of compound **10e** (DMSO-*d*<sub>6</sub>)

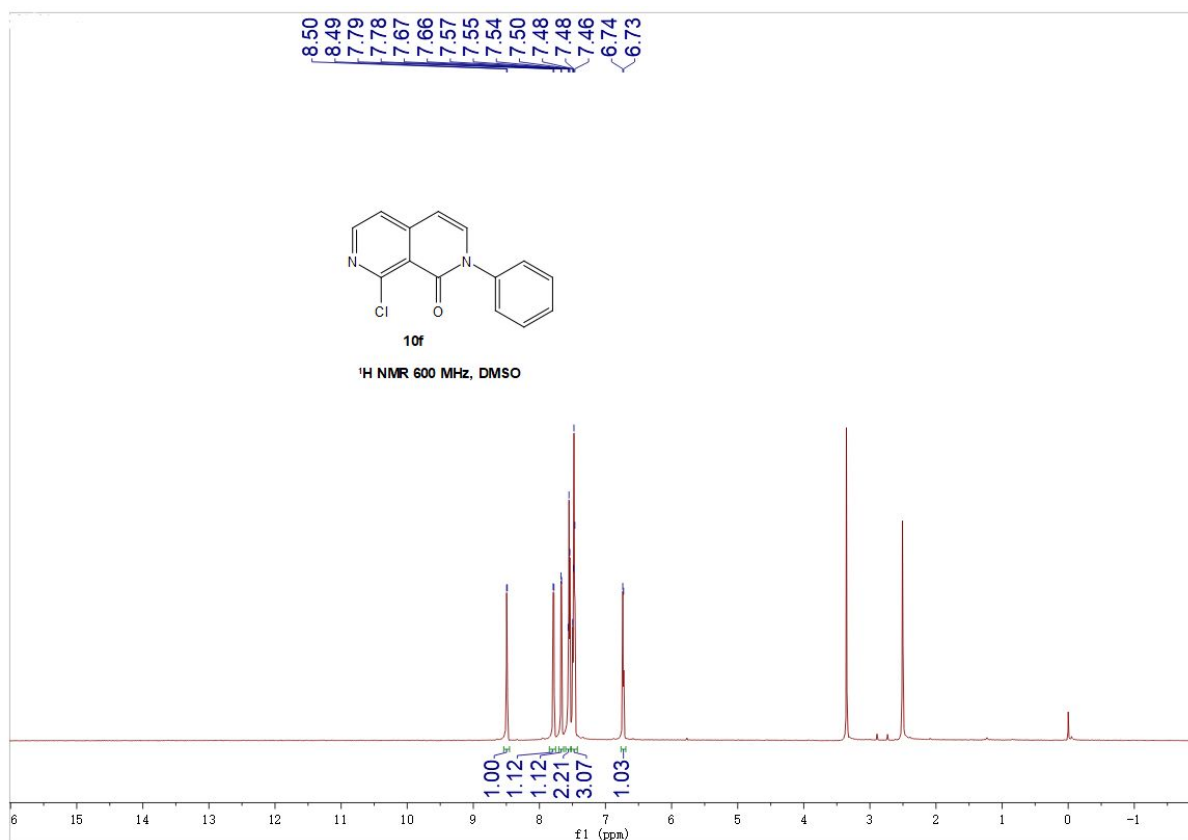

Figure S11: 600 MHz spectrum of <sup>1</sup>H-NMR of compound **10f** (DMSO-*d*<sub>6</sub>)

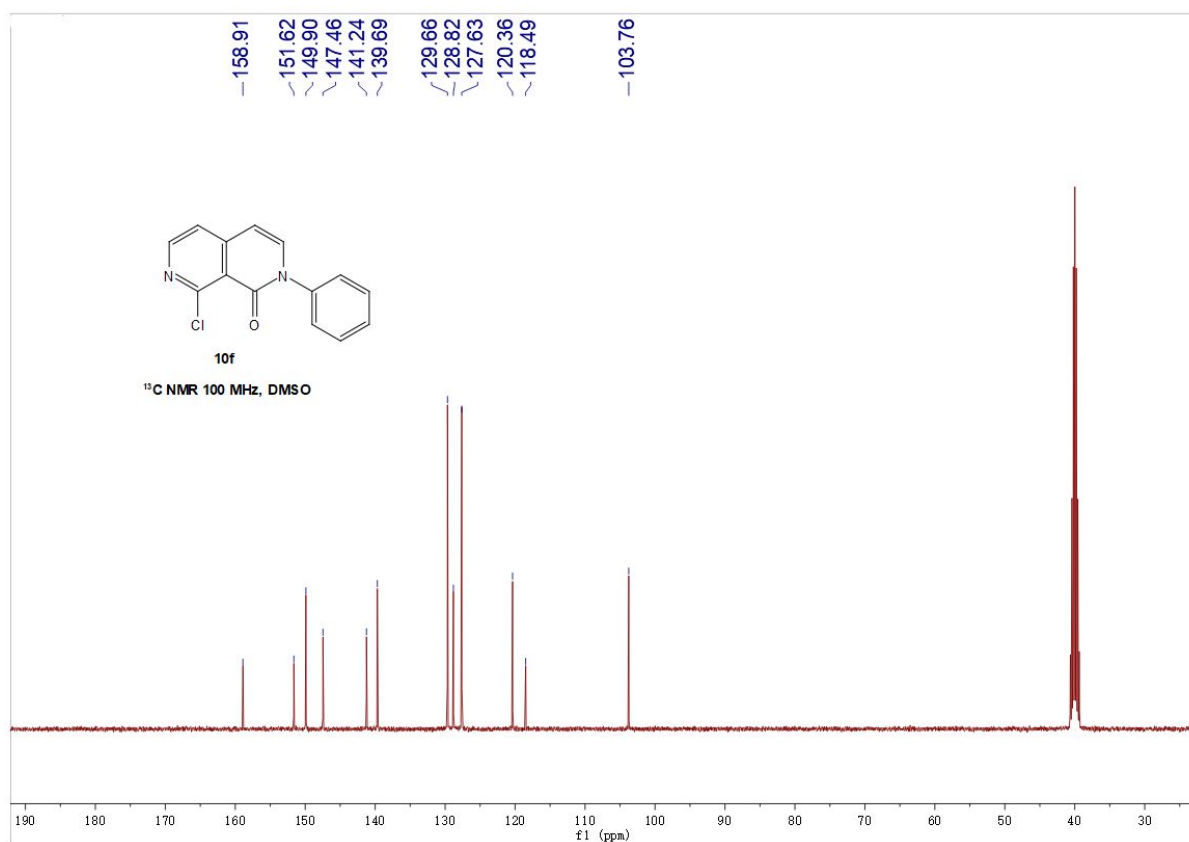

Figure S12: 100 MHz spectrum of <sup>13</sup>C-NMR of compound **10f** (DMSO-*d*<sub>6</sub>)



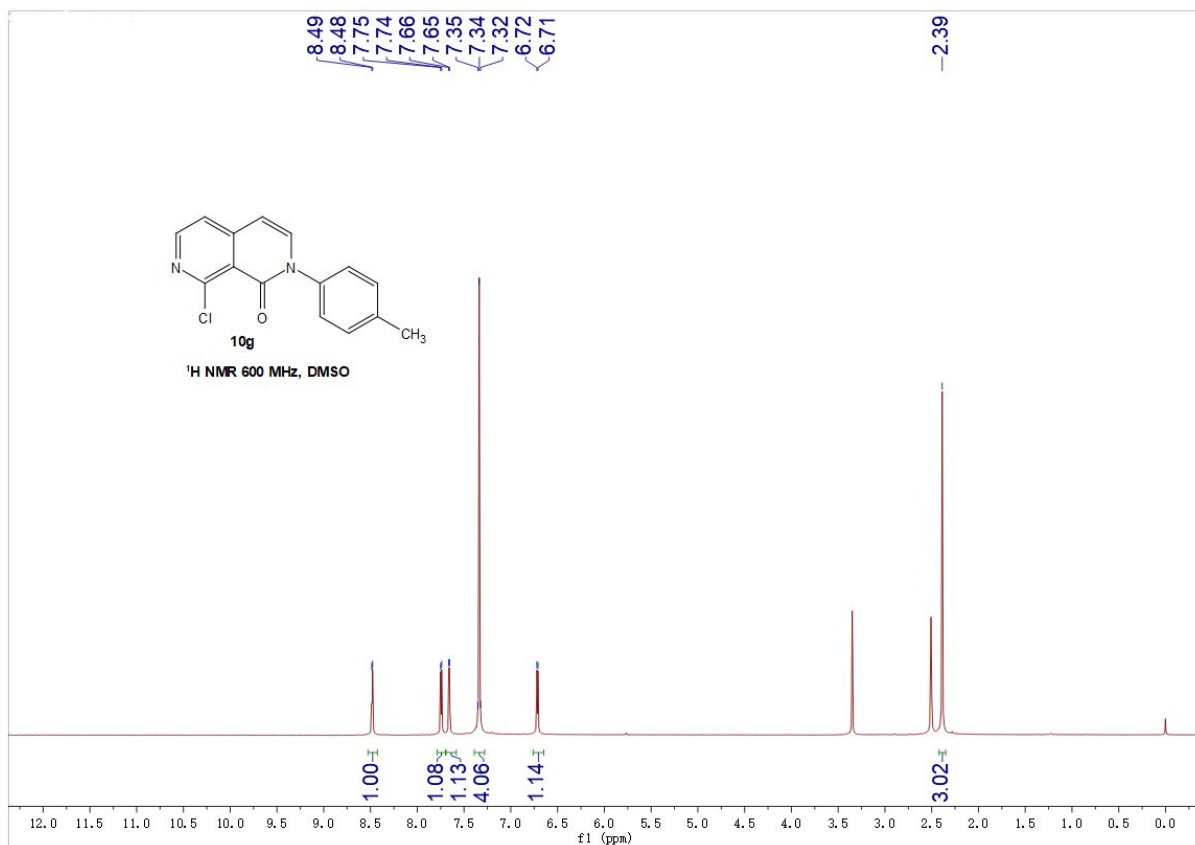

Figure S13: 600 MHz spectrum of <sup>1</sup>H-NMR of compound **10g** (DMSO-*d*<sub>6</sub>)

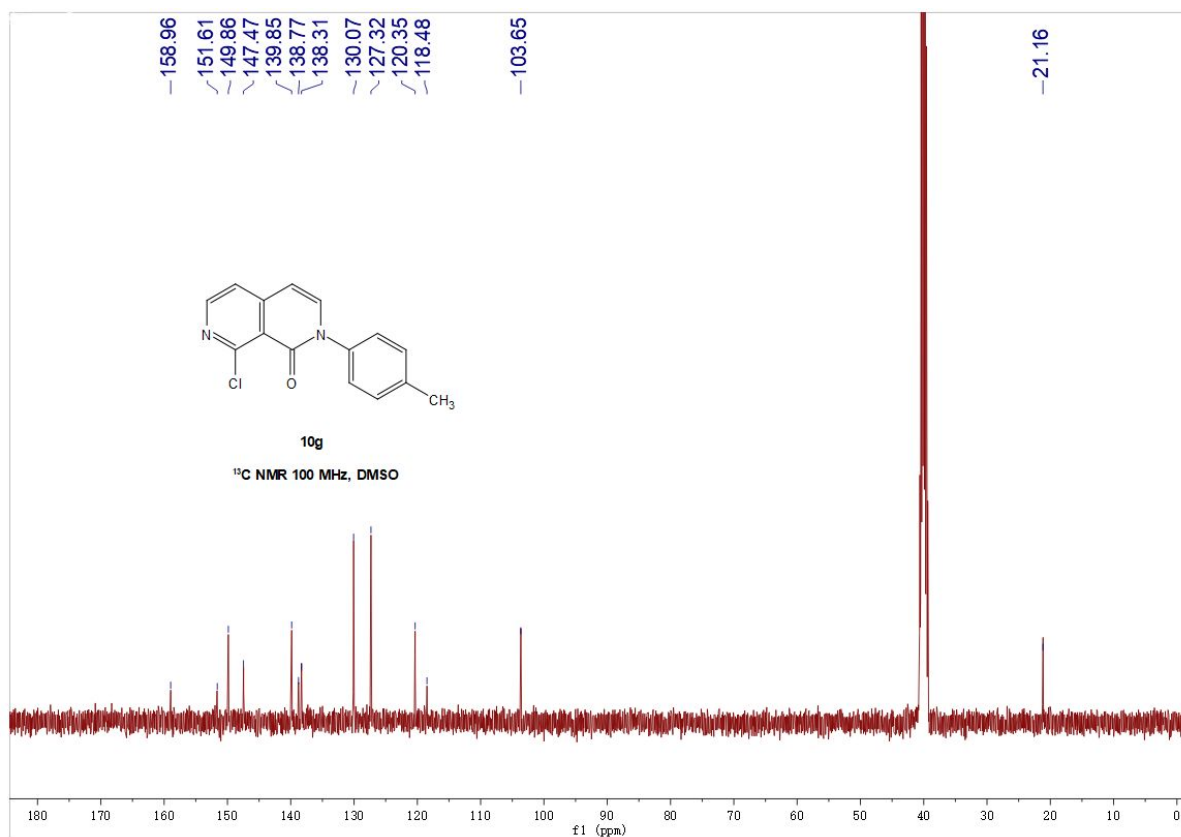

Figure S14: 100 MHz spectrum of <sup>13</sup>C-NMR of compound **10g** (DMSO-*d*<sub>6</sub>)

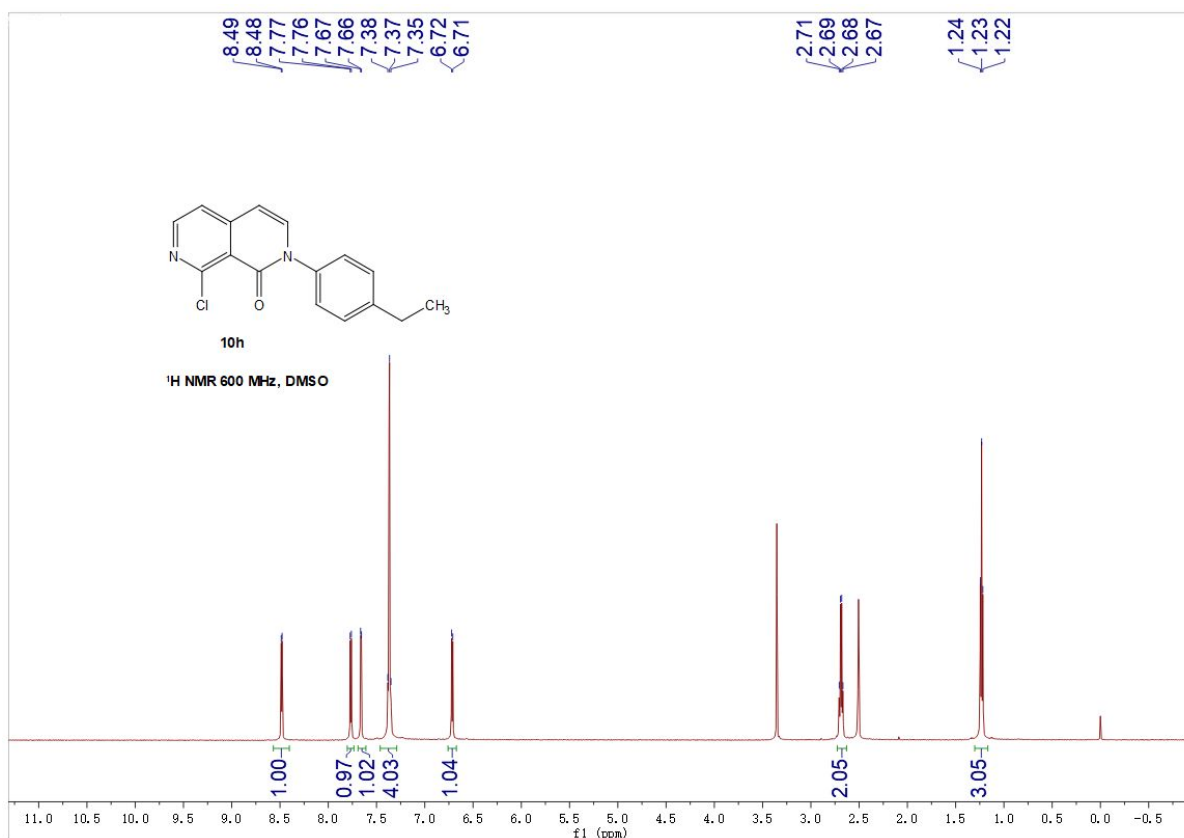

Figure S15: 600 MHz spectrum of <sup>1</sup>H-NMR of compound **10h** (DMSO-*d*<sub>6</sub>)

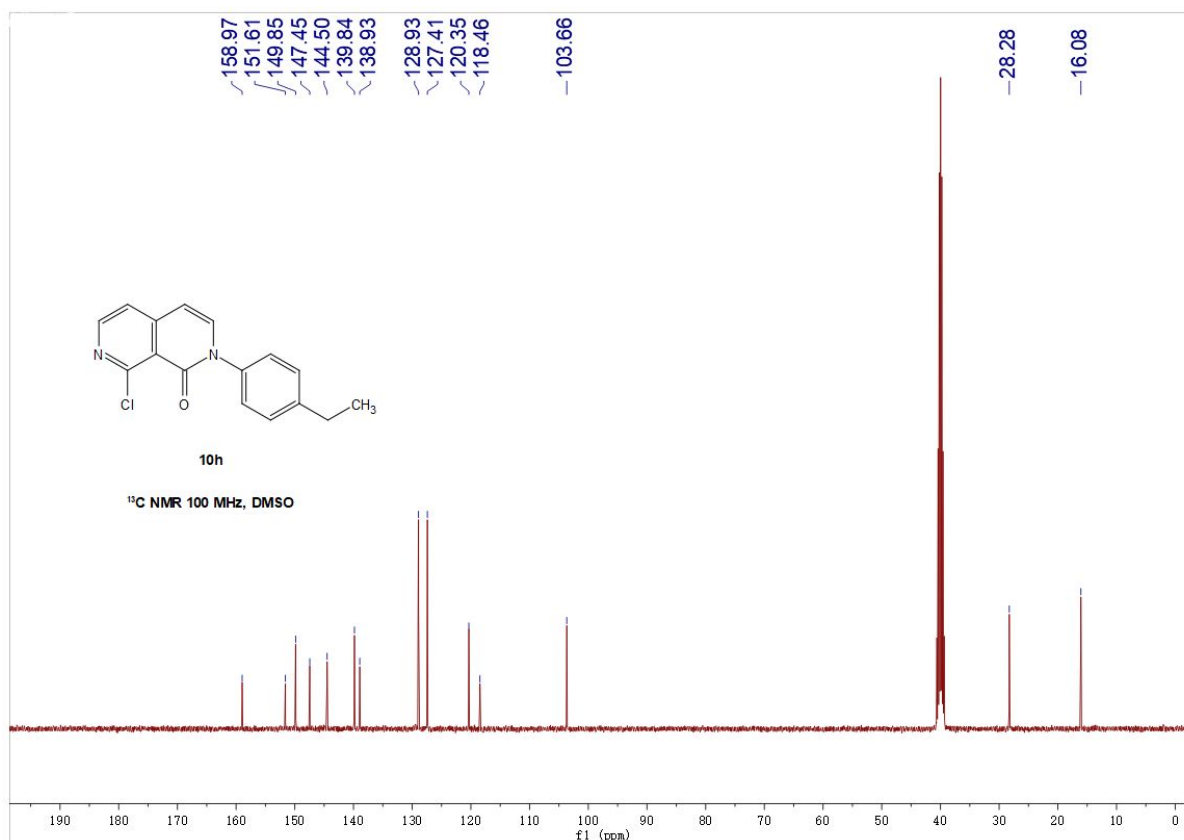

Figure S16: 100 MHz spectrum of <sup>13</sup>C-NMR of compound **10h** (DMSO-*d*<sub>6</sub>)

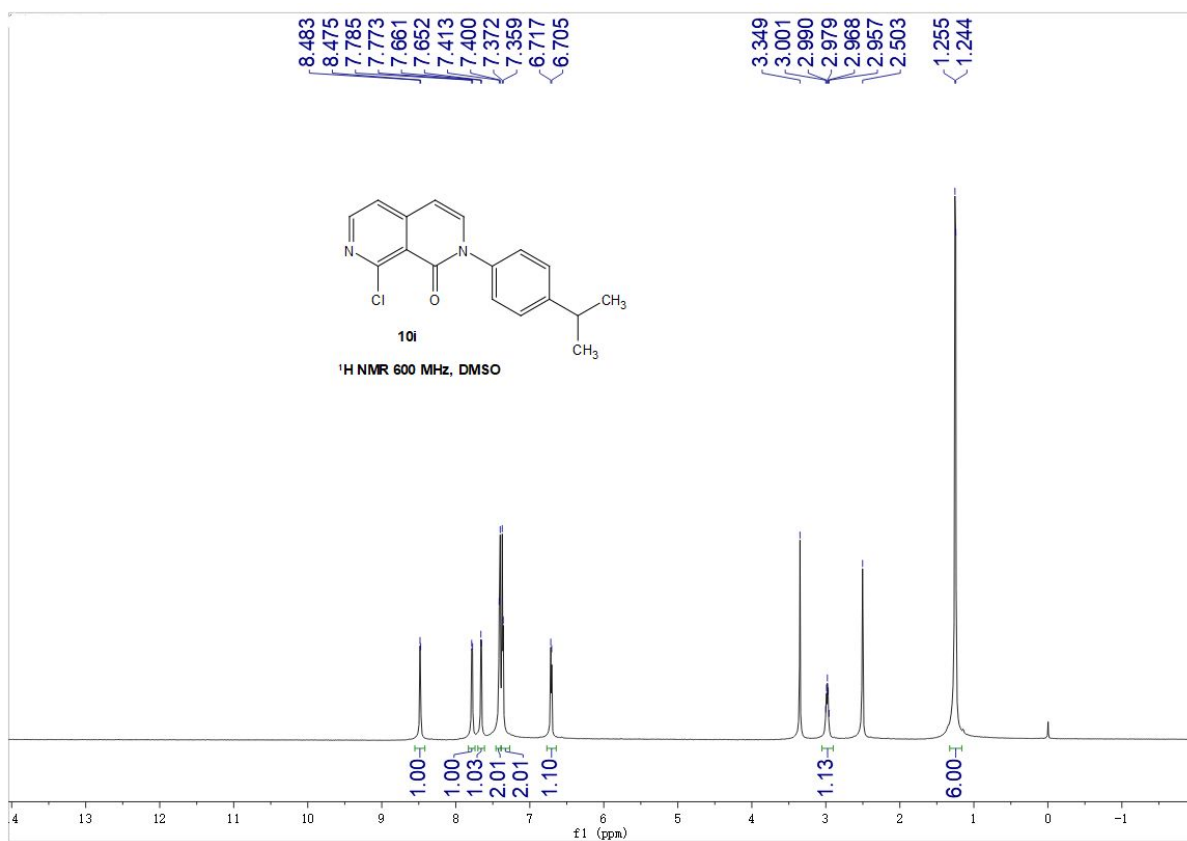

Figure S17: 600 MHz spectrum of <sup>1</sup>H-NMR of compound **10i**(DMSO-*d*<sub>6</sub>)

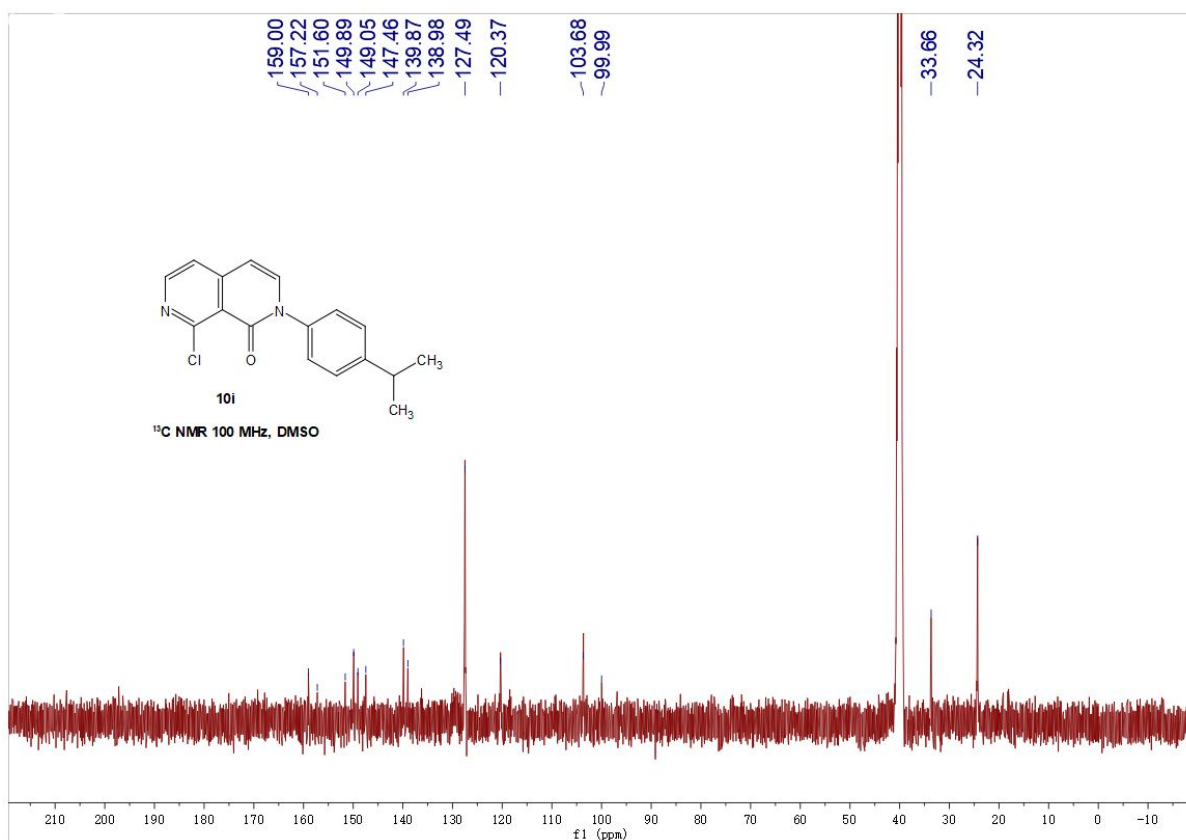

Figure S18: 100 MHz spectrum of <sup>13</sup>C-NMR of compound **10i** (DMSO-*d*<sub>6</sub>)

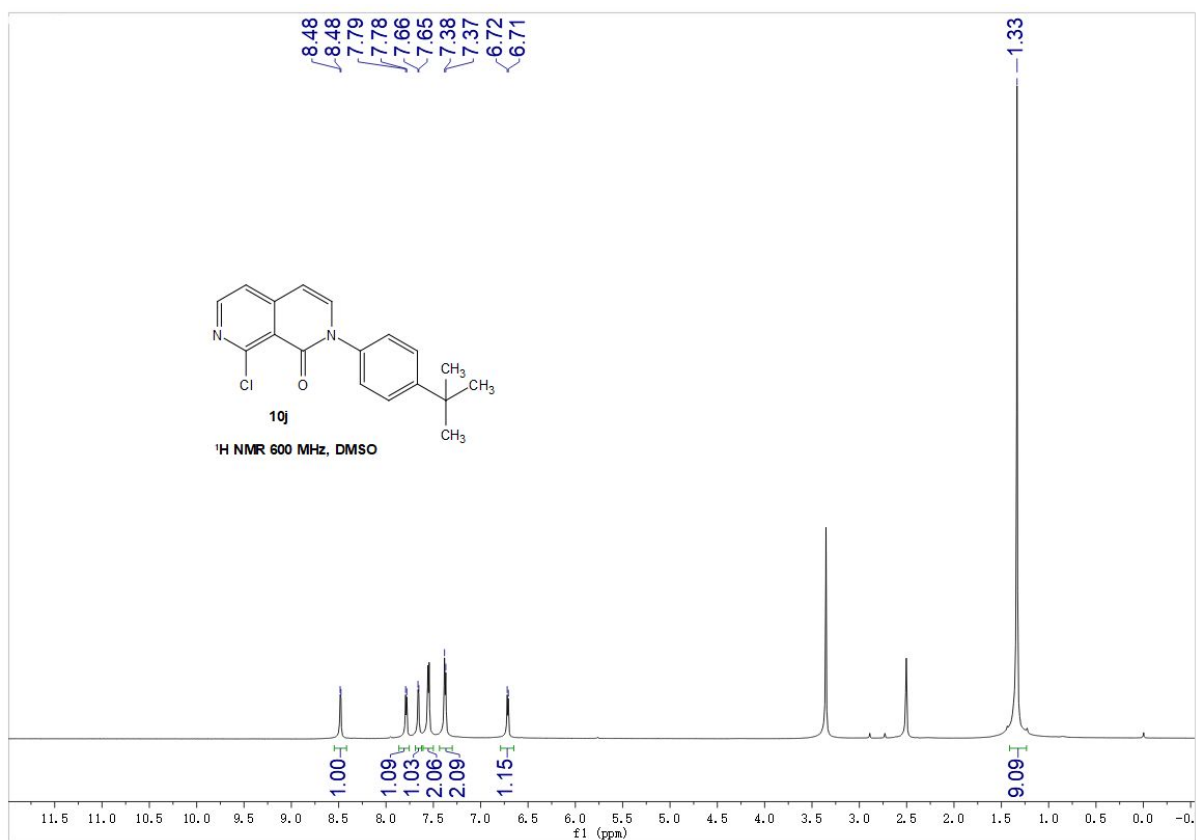

Figure S19: 600 MHz spectrum of <sup>1</sup>H-NMR of compound **10j** (DMSO-*d*<sub>6</sub>)

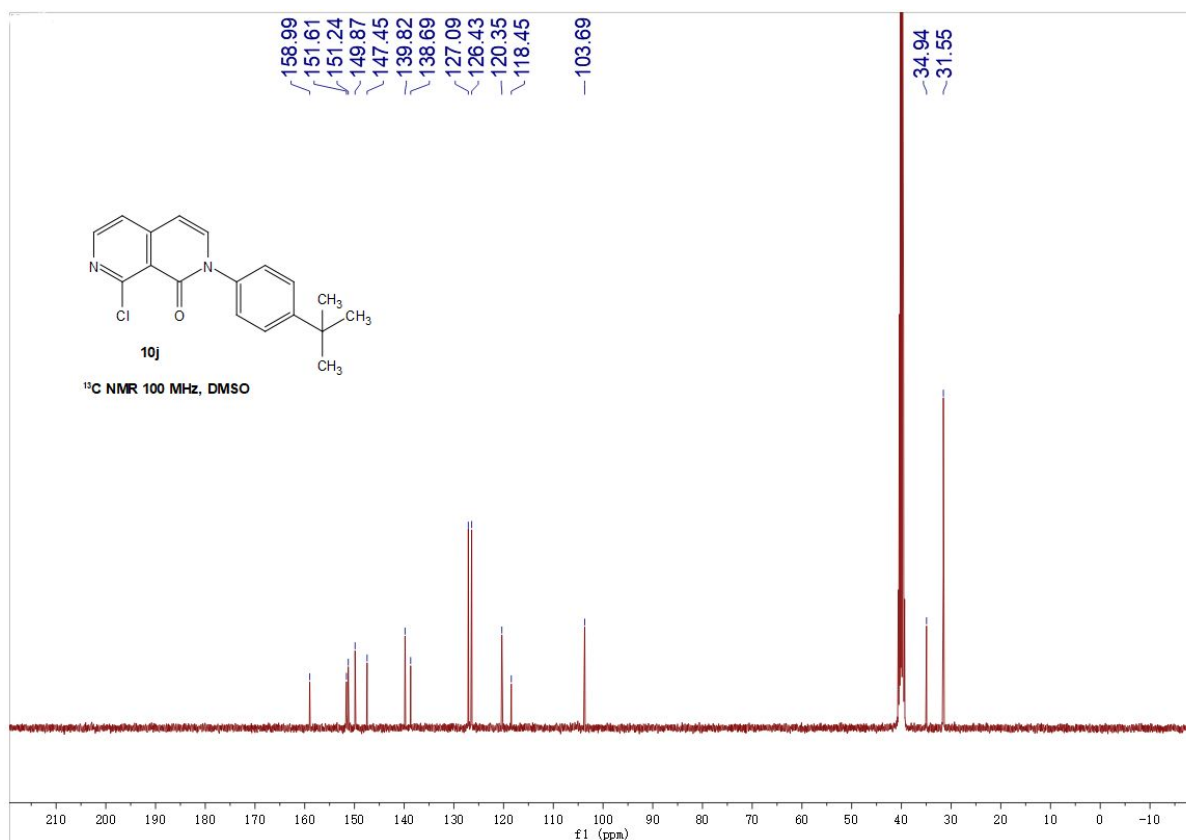

Figure S20: 100 MHz spectrum of <sup>13</sup>C-NMR of compound **10j** (DMSO-*d*<sub>6</sub>)

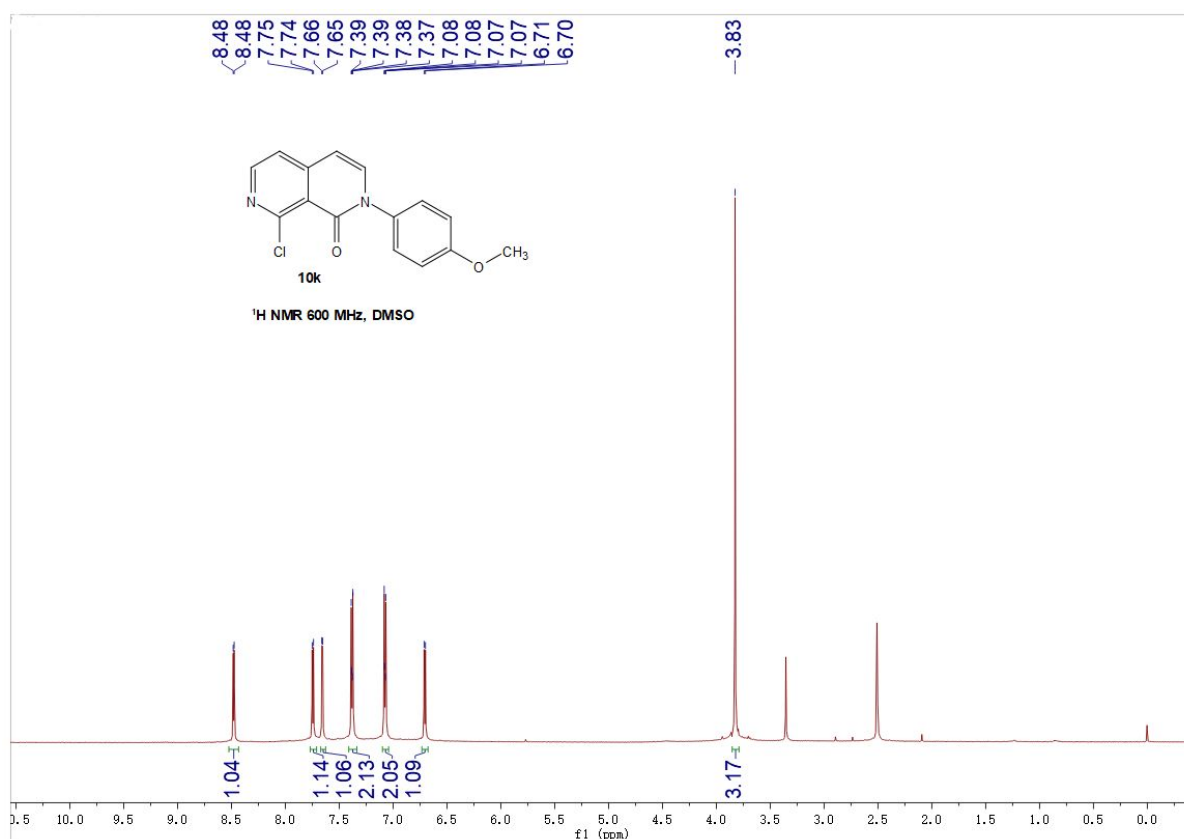

Figure S21: 600 MHz spectrum of <sup>1</sup>H-NMR of compound **10k** (DMSO-*d*<sub>6</sub>)

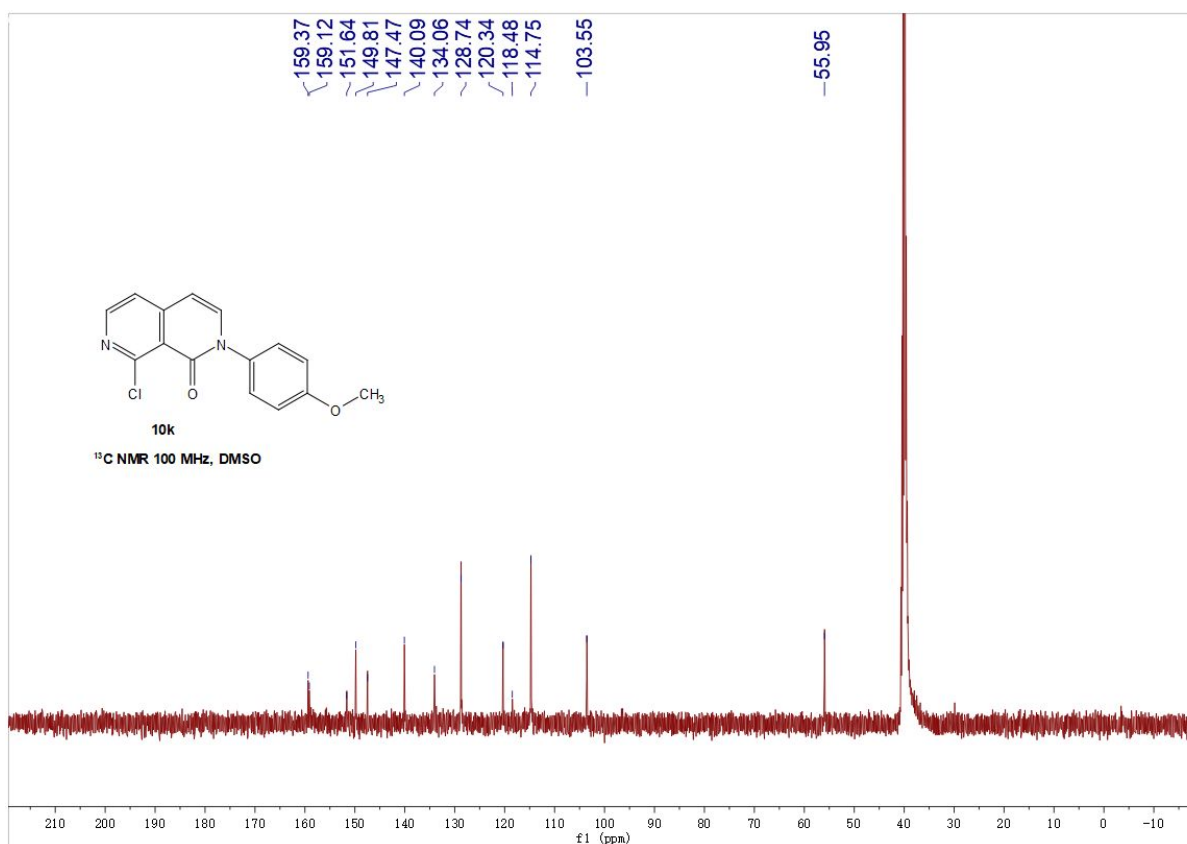

Figure S22: 100 MHz spectrum of <sup>13</sup>C-NMR of compound **10k** (DMSO-*d*<sub>6</sub>)

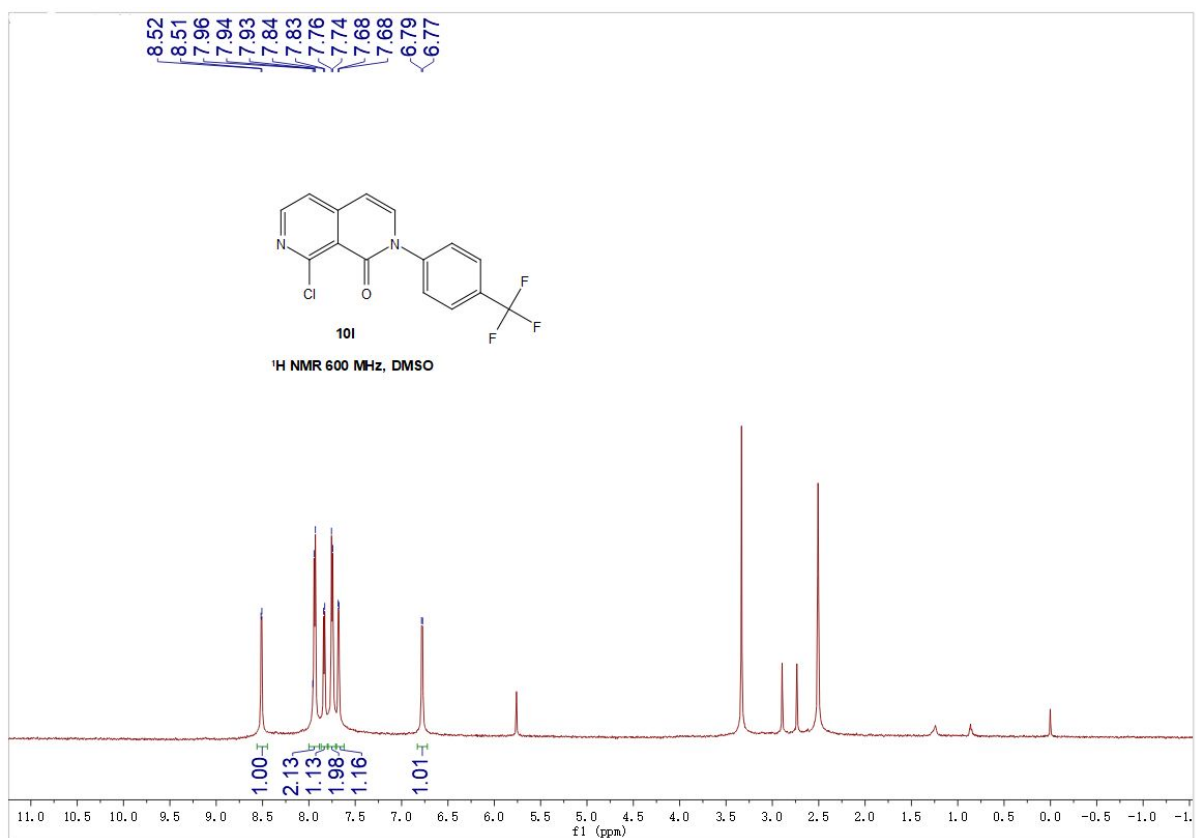

Figure S23: 600 MHz spectrum of <sup>1</sup>H-NMR of compound **10I** (DMSO-*d*<sub>6</sub>)

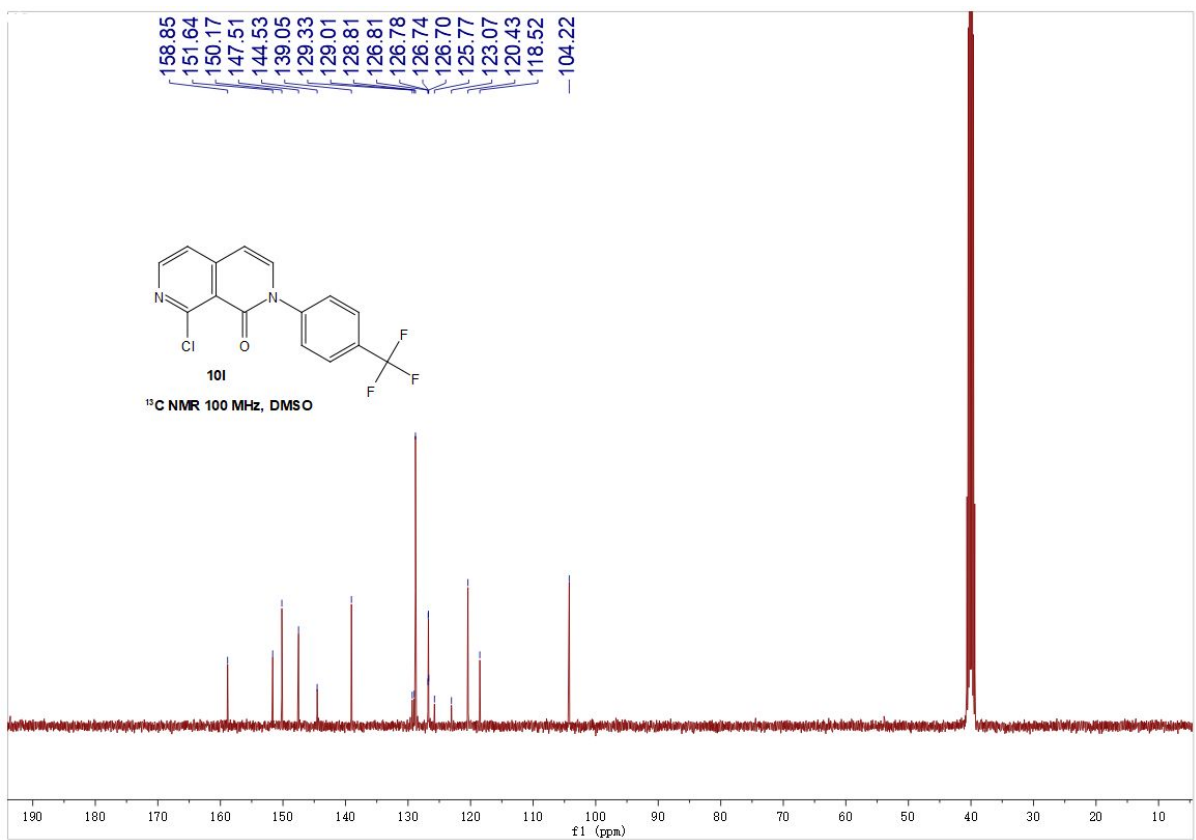

Figure S24: 100 MHz spectrum of <sup>13</sup>C-NMR of compound **10I** (DMSO-*d*<sub>6</sub>)

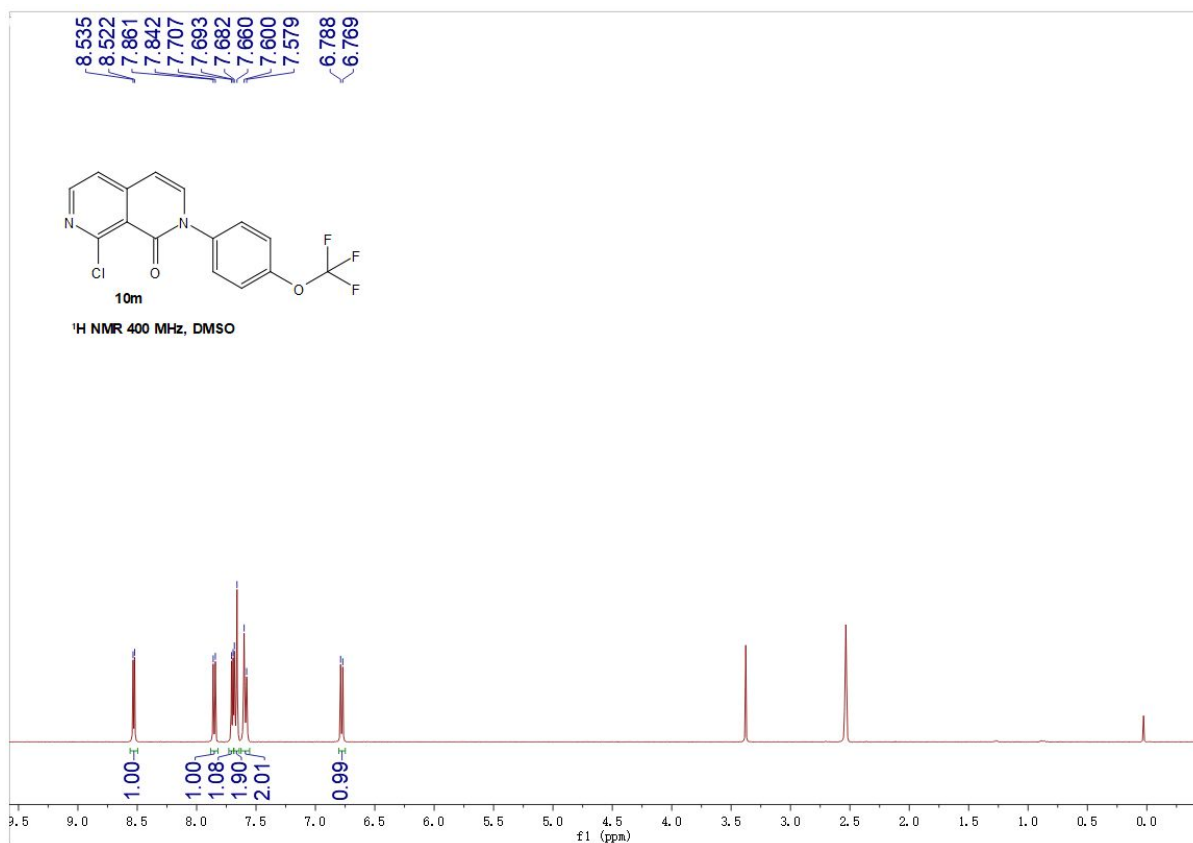

Figure S25: 400 MHz spectrum of <sup>1</sup>H-NMR of compound **10m** (DMSO-*d*<sub>6</sub>)

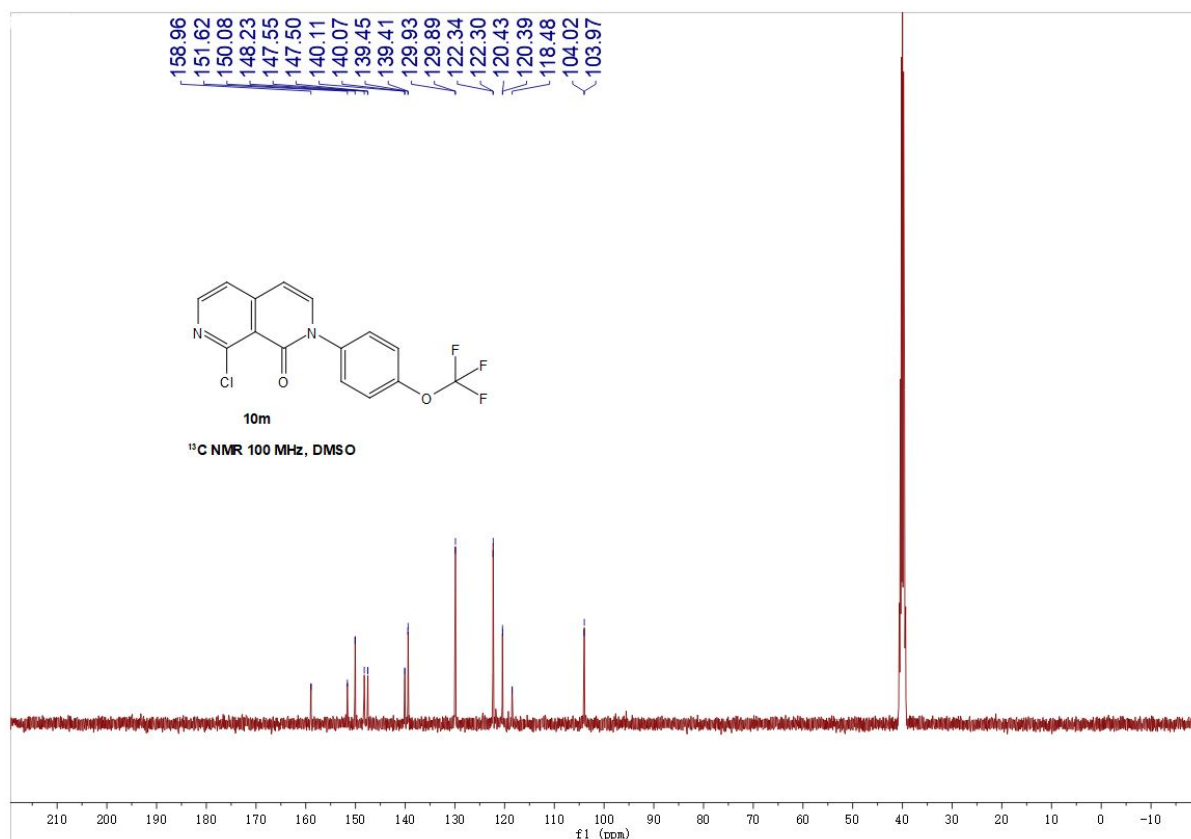

Figure S26: 100 MHz spectrum of <sup>13</sup>C-NMR of compound **10m** (DMSO-*d*<sub>6</sub>)

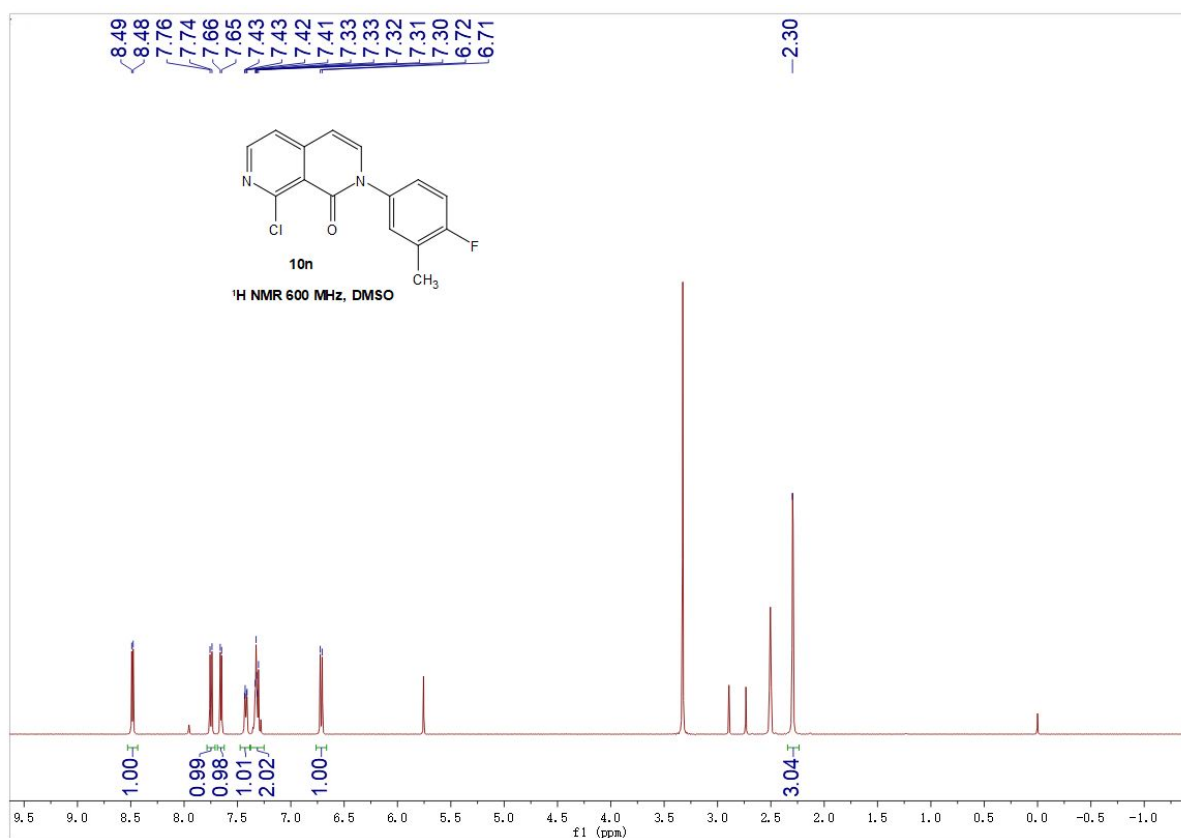

Figure S27: 600 MHz spectrum of <sup>1</sup>H-NMR of compound **10n** (DMSO-*d*<sub>6</sub>)

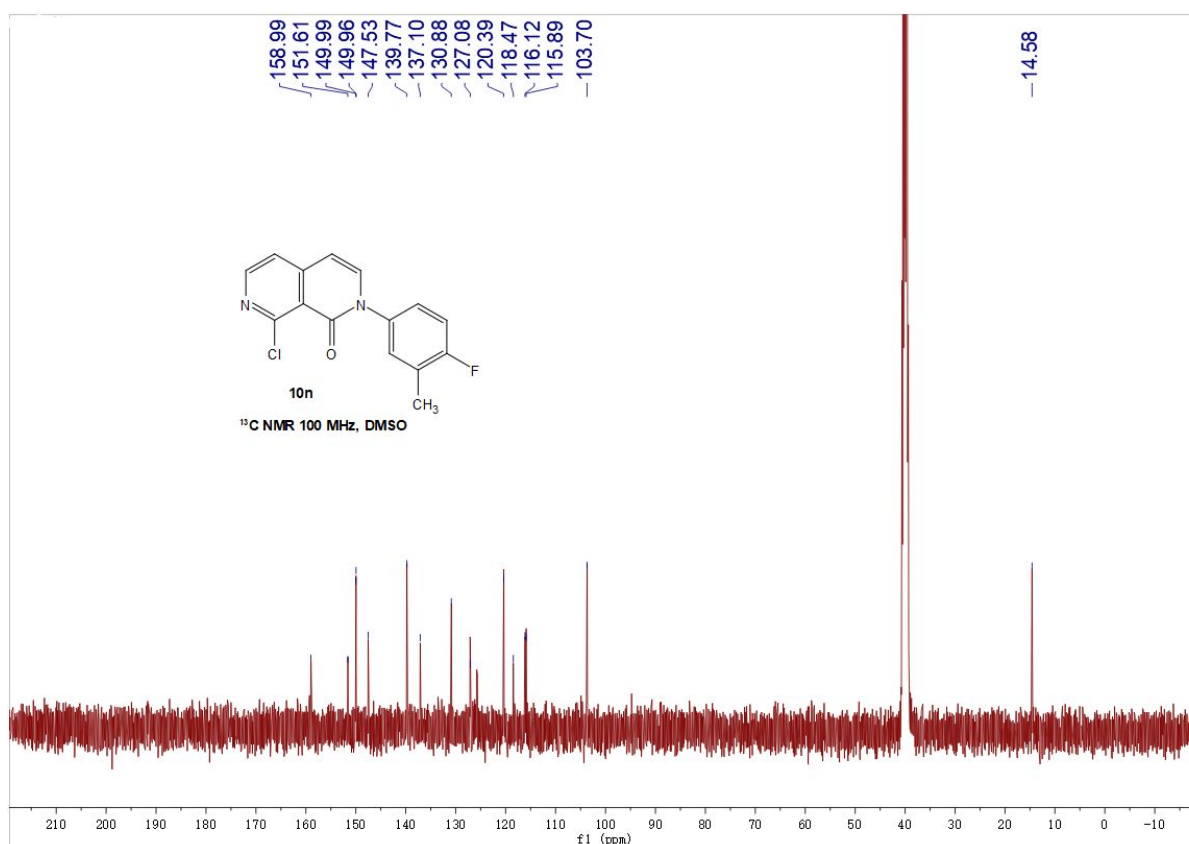

Figure S28: 100 MHz spectrum of <sup>13</sup>C-NMR of compound **10n** (DMSO-*d*<sub>6</sub>)



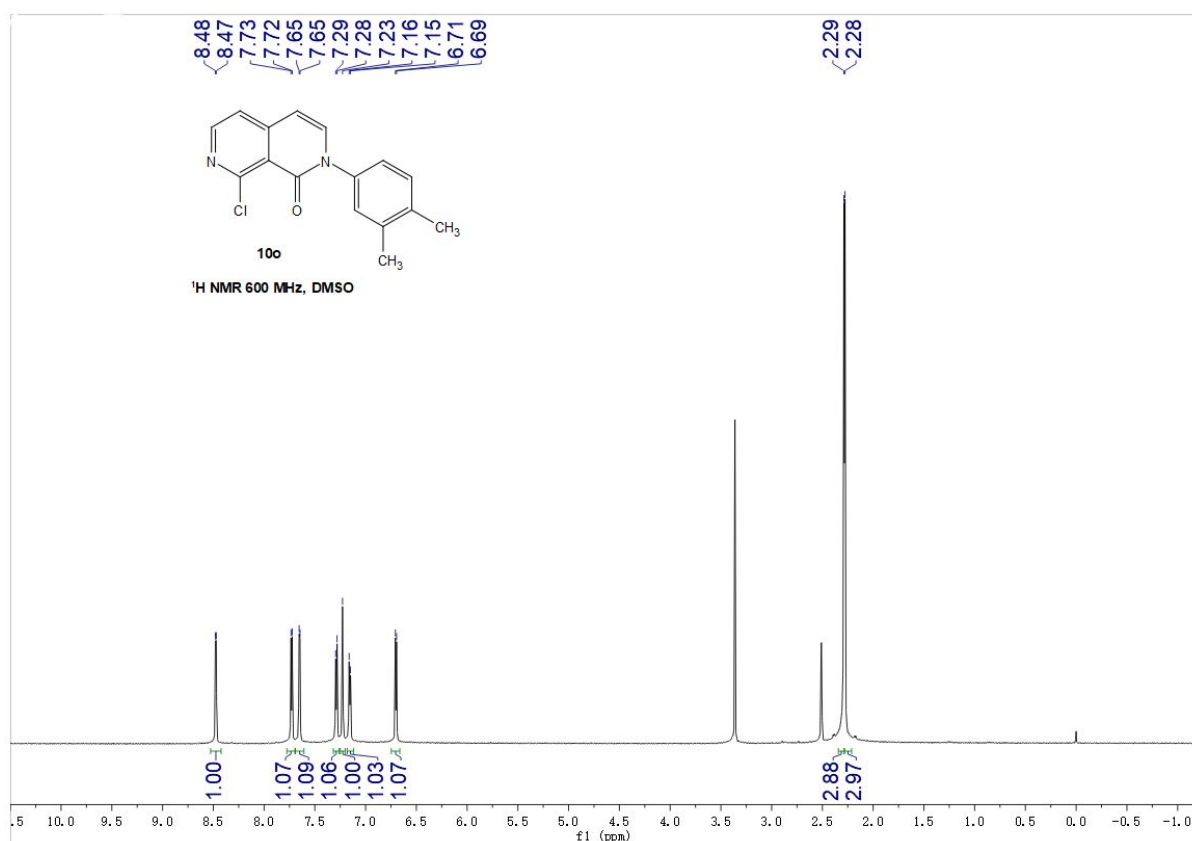

Figure S29: 600 MHz spectrum of <sup>1</sup>H-NMR of compound **10o** (DMSO-*d*<sub>6</sub>)

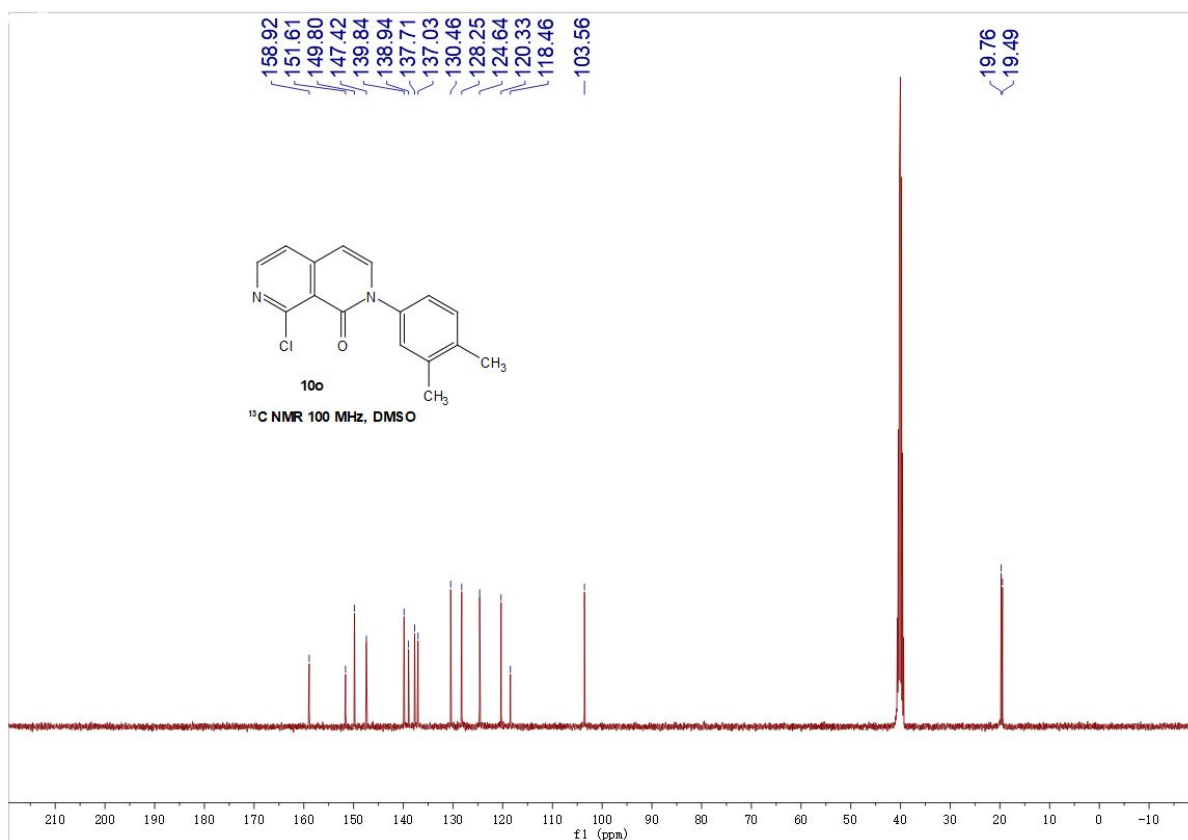

Figure S30: 100 MHz spectrum of <sup>13</sup>C-NMR of compound **10o** (DMSO-*d*<sub>6</sub>)

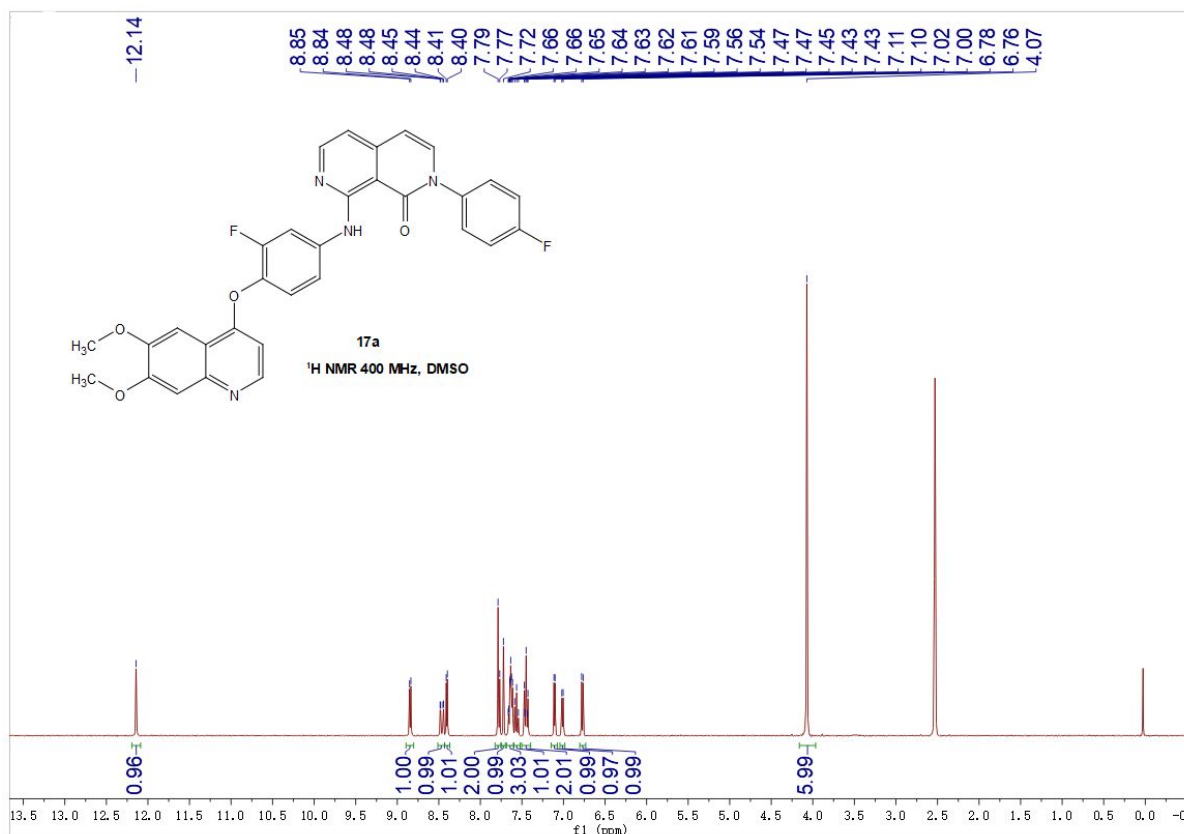

Figure S31: 400 MHz spectrum of <sup>1</sup>H-NMR of compound **17a** (DMSO-*d*<sub>6</sub>)

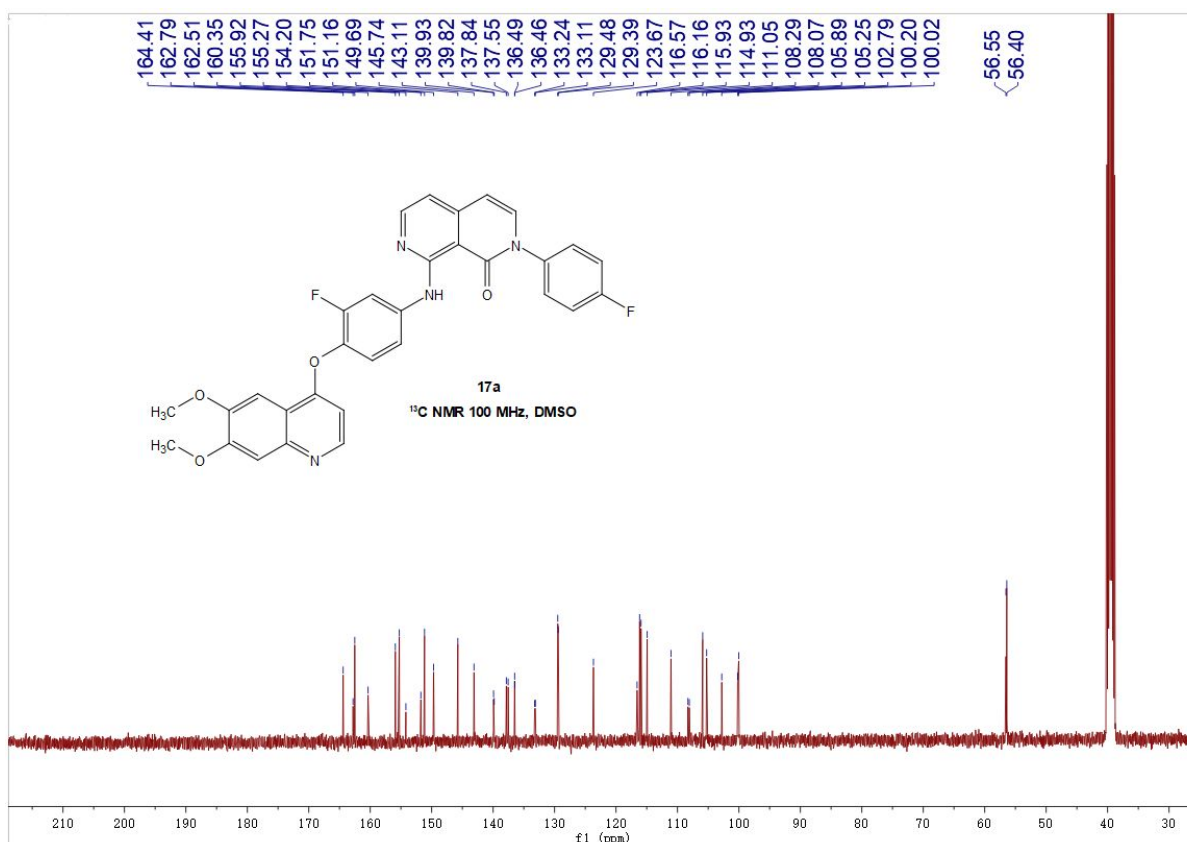

Figure S32: 100 MHz spectrum of <sup>13</sup>C-NMR of compound **17a** (DMSO-*d*<sub>6</sub>)

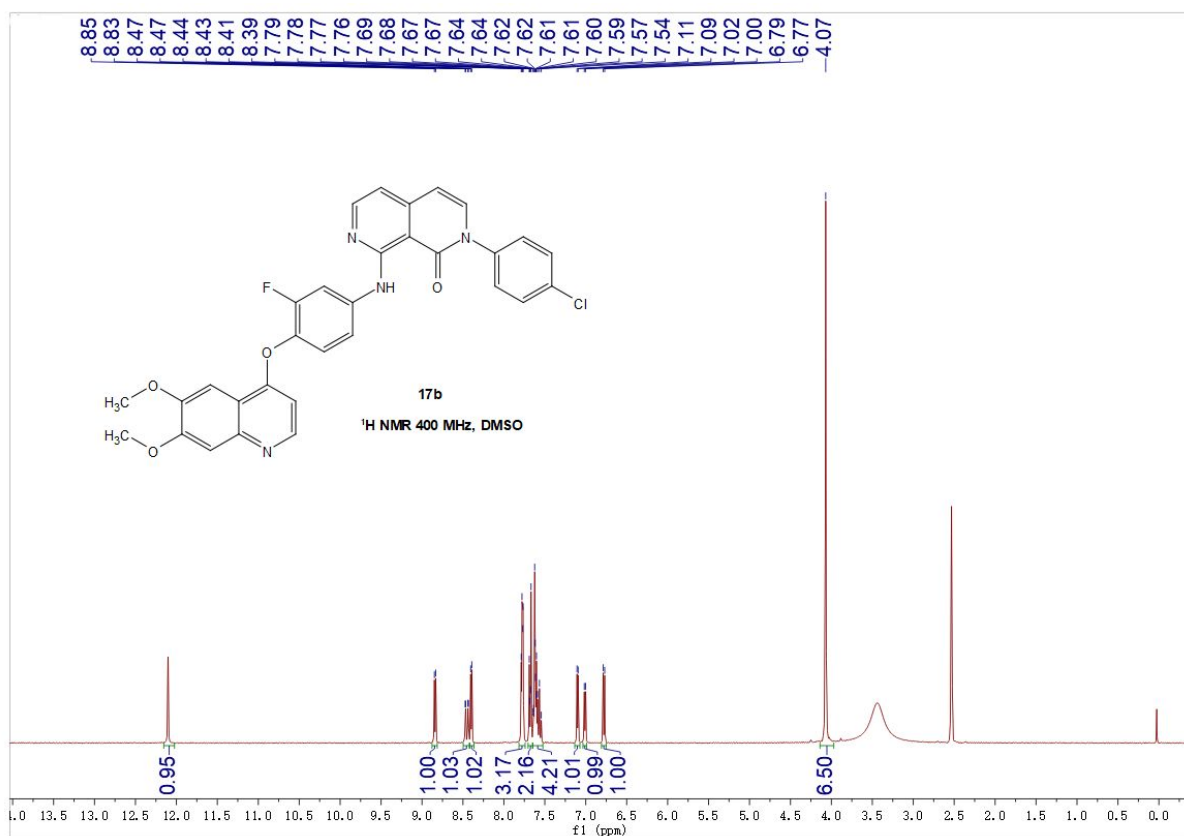

Figure S33: 400 MHz spectrum of <sup>1</sup>H-NMR of compound **17b** (DMSO-*d*<sub>6</sub>)

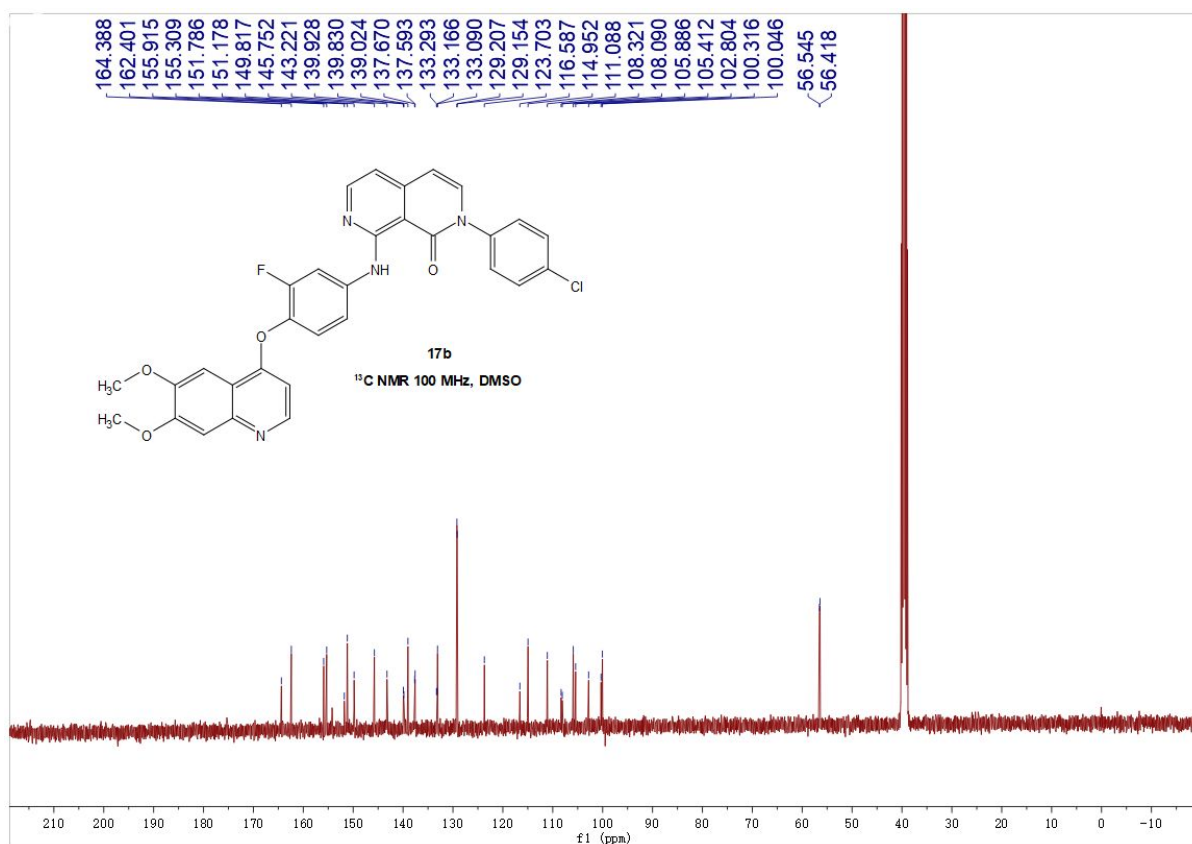

Figure S34: 100 MHz spectrum of <sup>13</sup>C-NMR of compound **17b** (DMSO-*d*<sub>6</sub>)

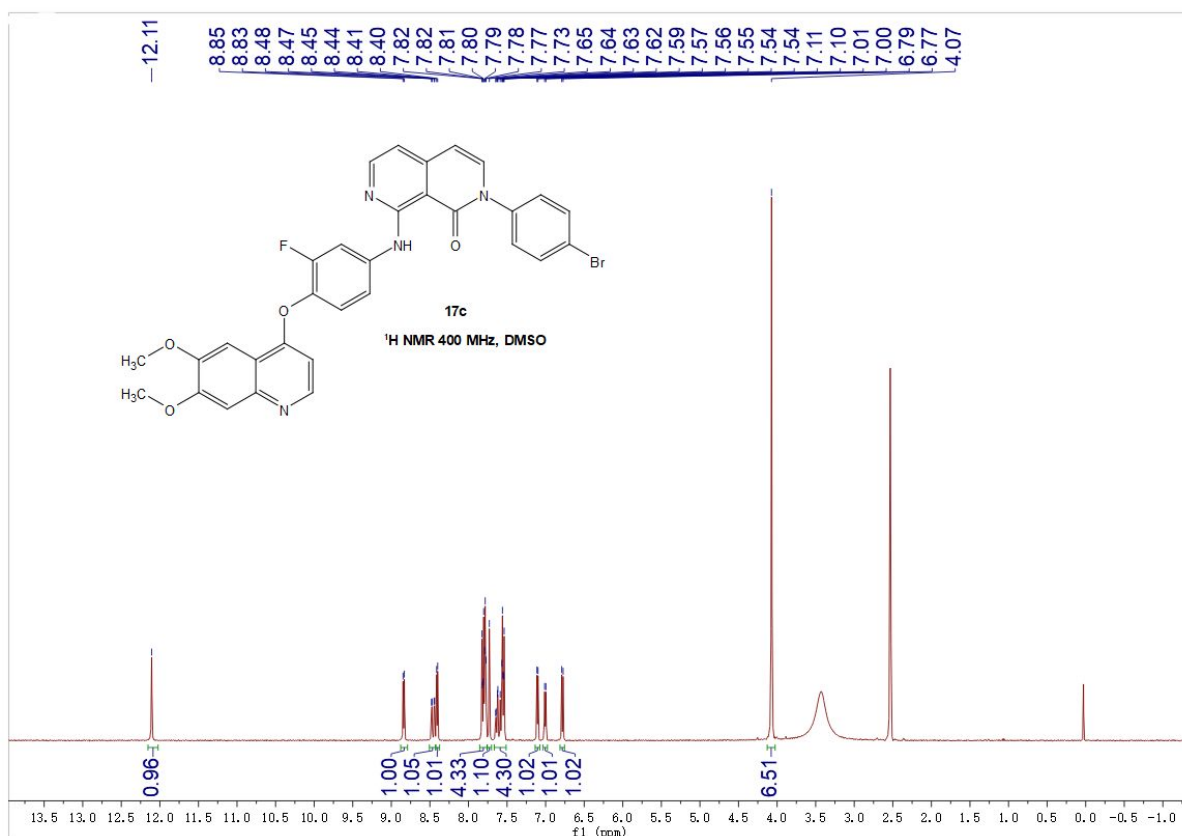

Figure S35: 400 MHz spectrum of <sup>1</sup>H-NMR of compound **17c** (DMSO-*d*<sub>6</sub>)

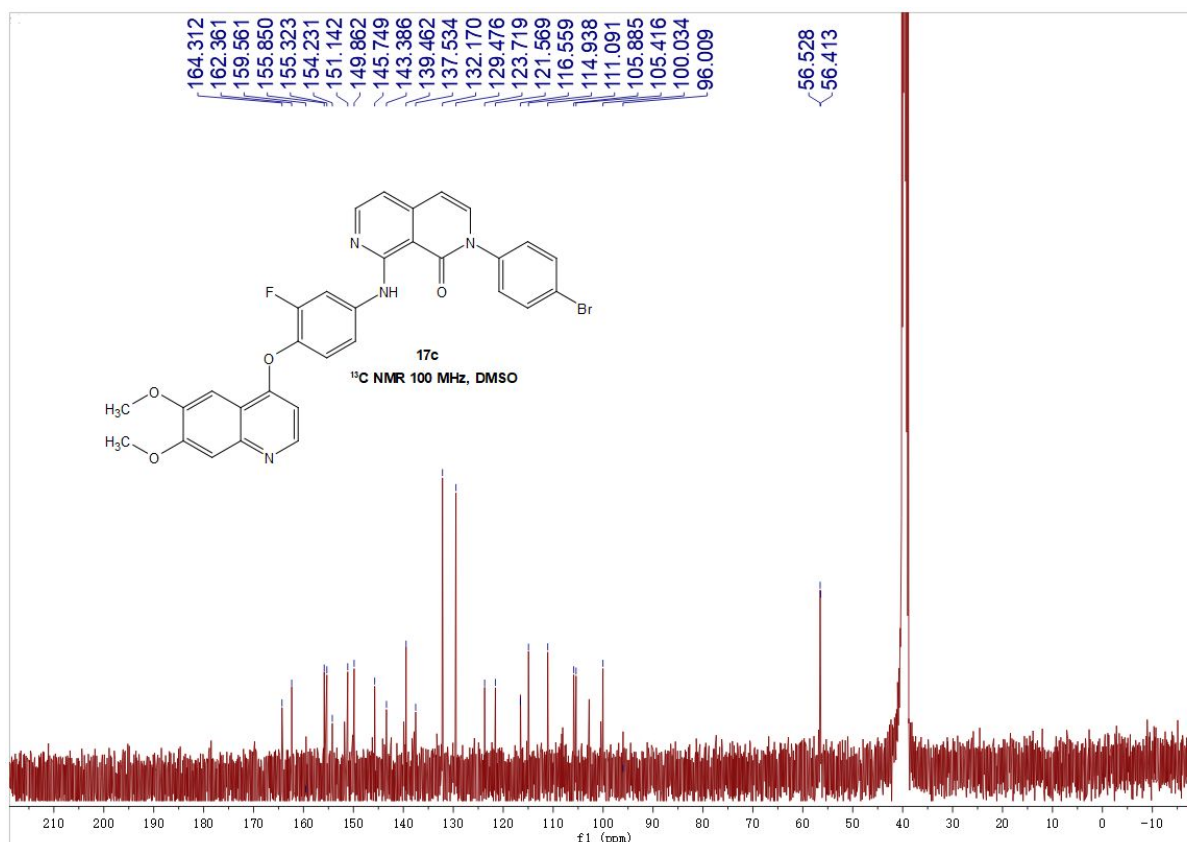

Figure S36: 100 MHz spectrum of <sup>13</sup>C-NMR of compound **17c** (DMSO-*d*<sub>6</sub>)

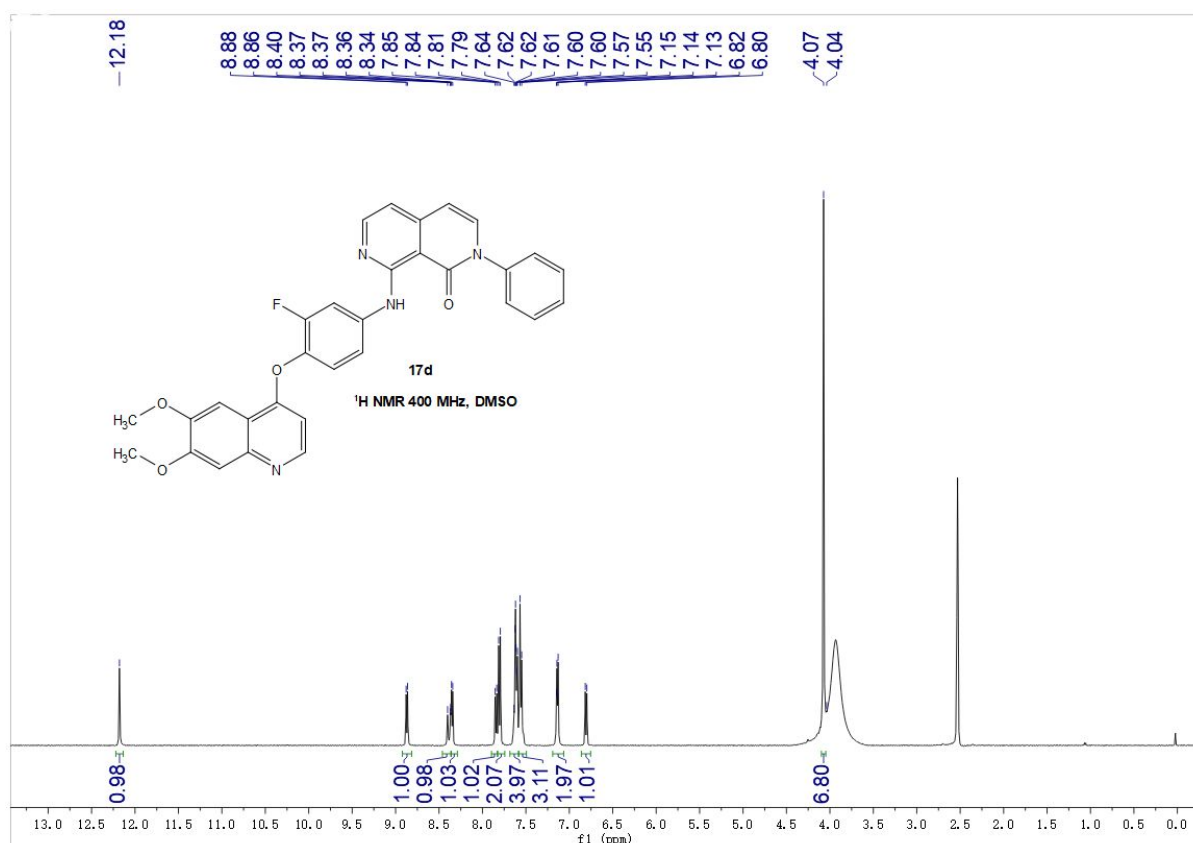

Figure S37: 400 MHz spectrum of <sup>1</sup>H-NMR of compound **17d** (DMSO-*d*<sub>6</sub>)

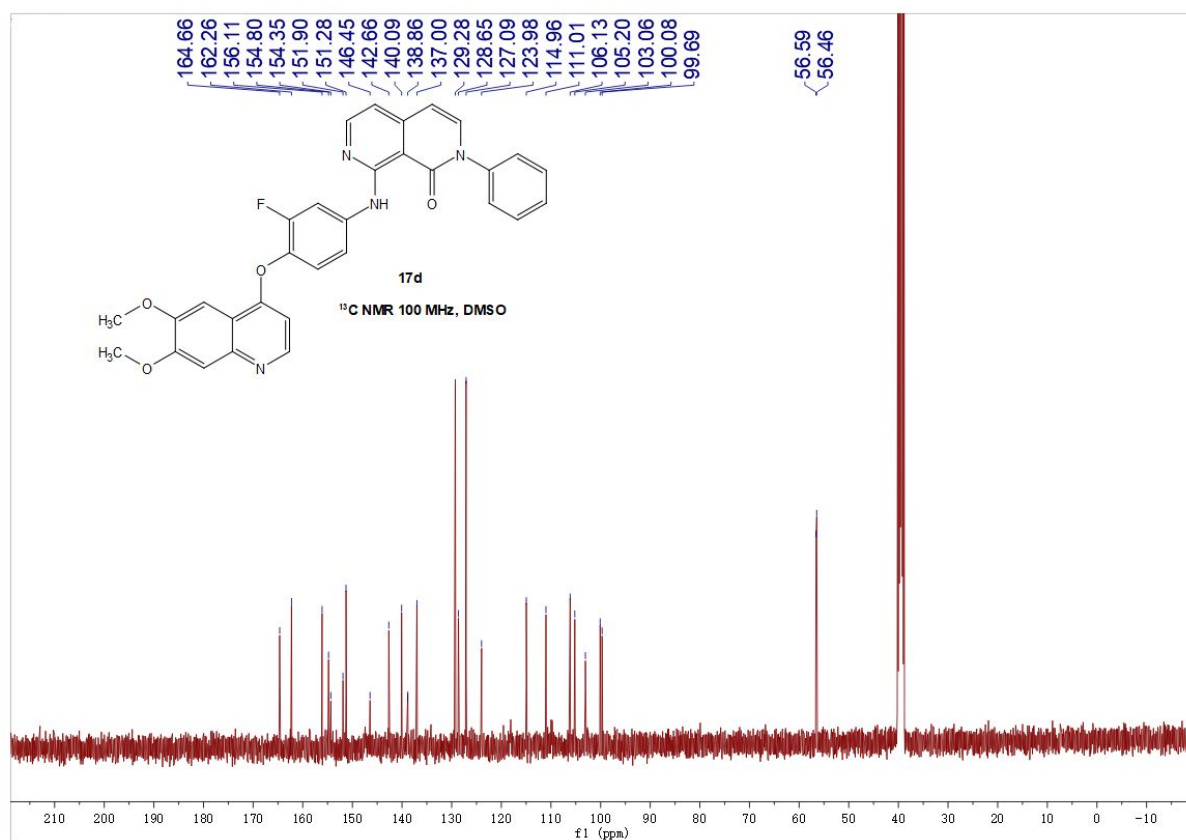

Figure S38: 100 MHz spectrum of <sup>13</sup>C-NMR of compound **17d** (DMSO-*d*<sub>6</sub>)

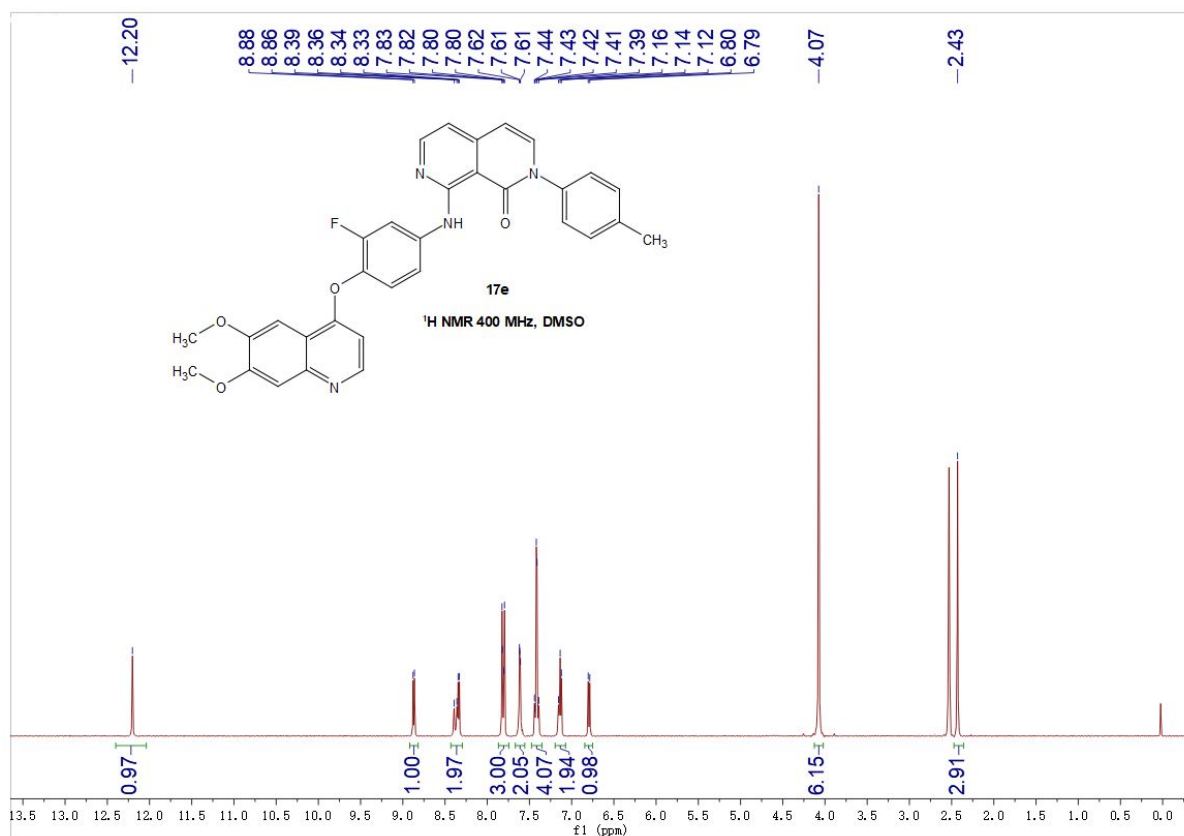

Figure S39: 400 MHz spectrum of <sup>1</sup>H-NMR of compound **17e** (DMSO-*d*<sub>6</sub>)

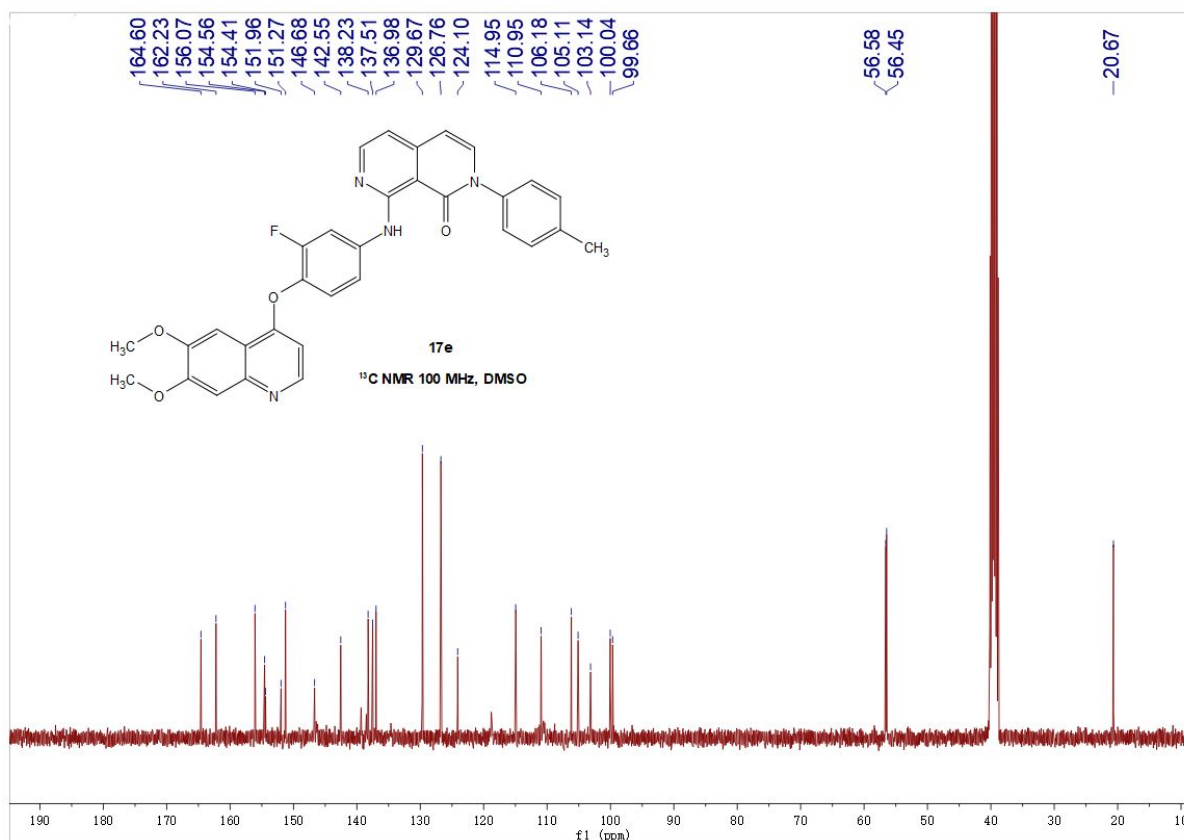

Figure S40: 100 MHz spectrum of <sup>13</sup>C-NMR of compound **17e** (DMSO-*d*<sub>6</sub>)



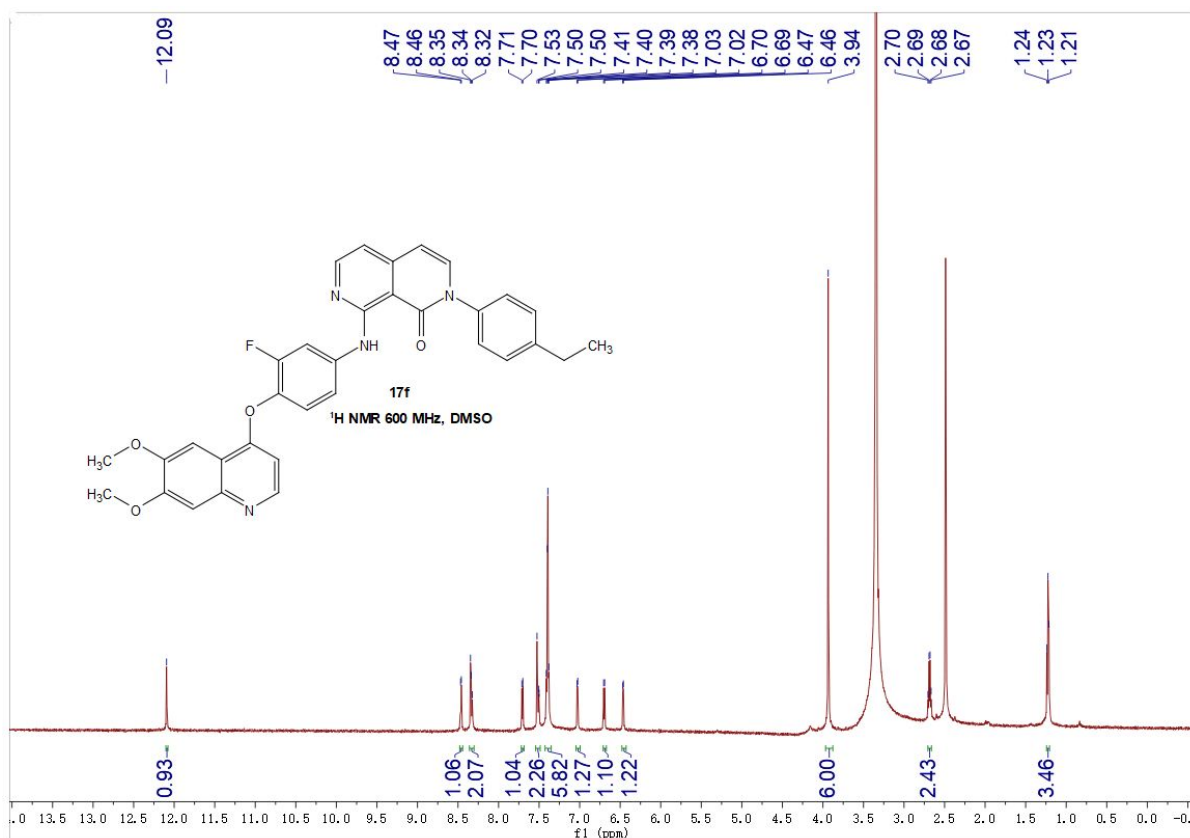

Figure S41: 600 MHz spectrum of <sup>1</sup>H-NMR of compound **17f** (DMSO-*d*<sub>6</sub>)

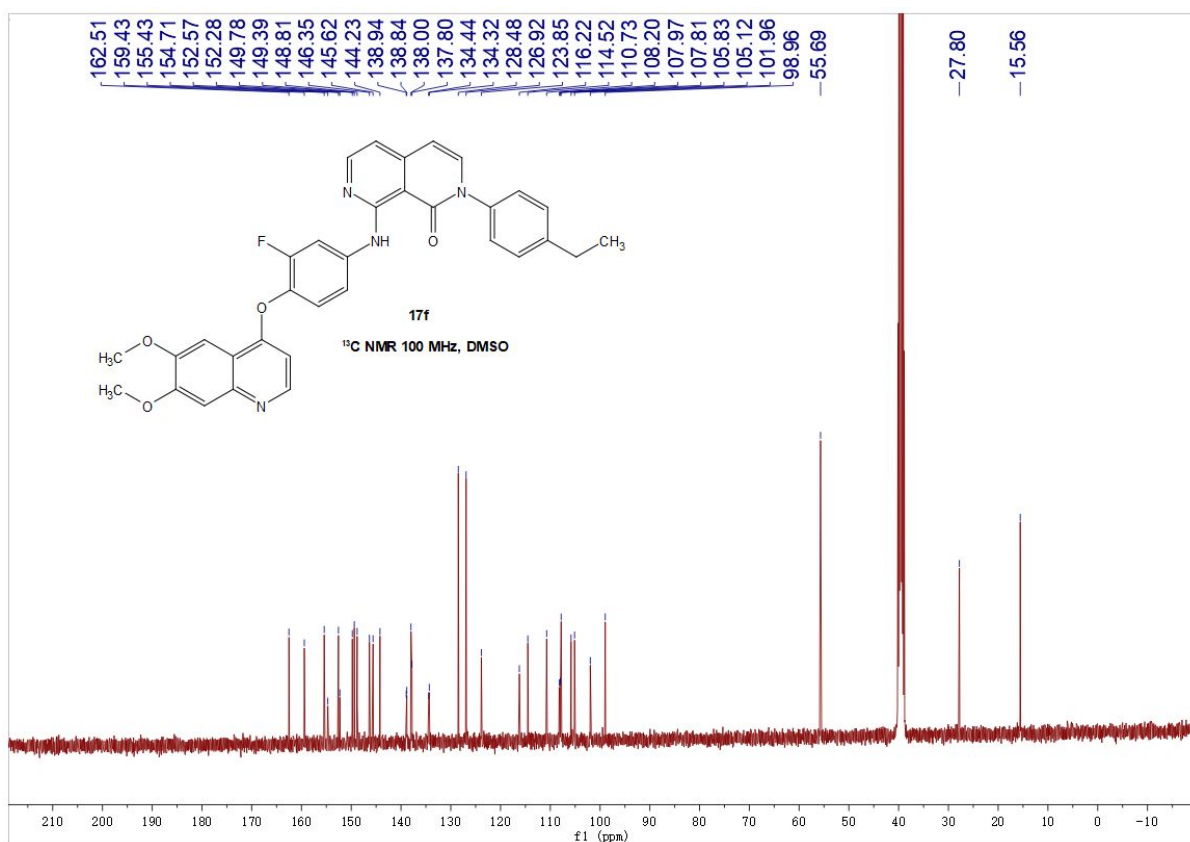

Figure S42: 100 MHz spectrum of <sup>13</sup>C-NMR of compound **17f** (DMSO-*d*<sub>6</sub>)

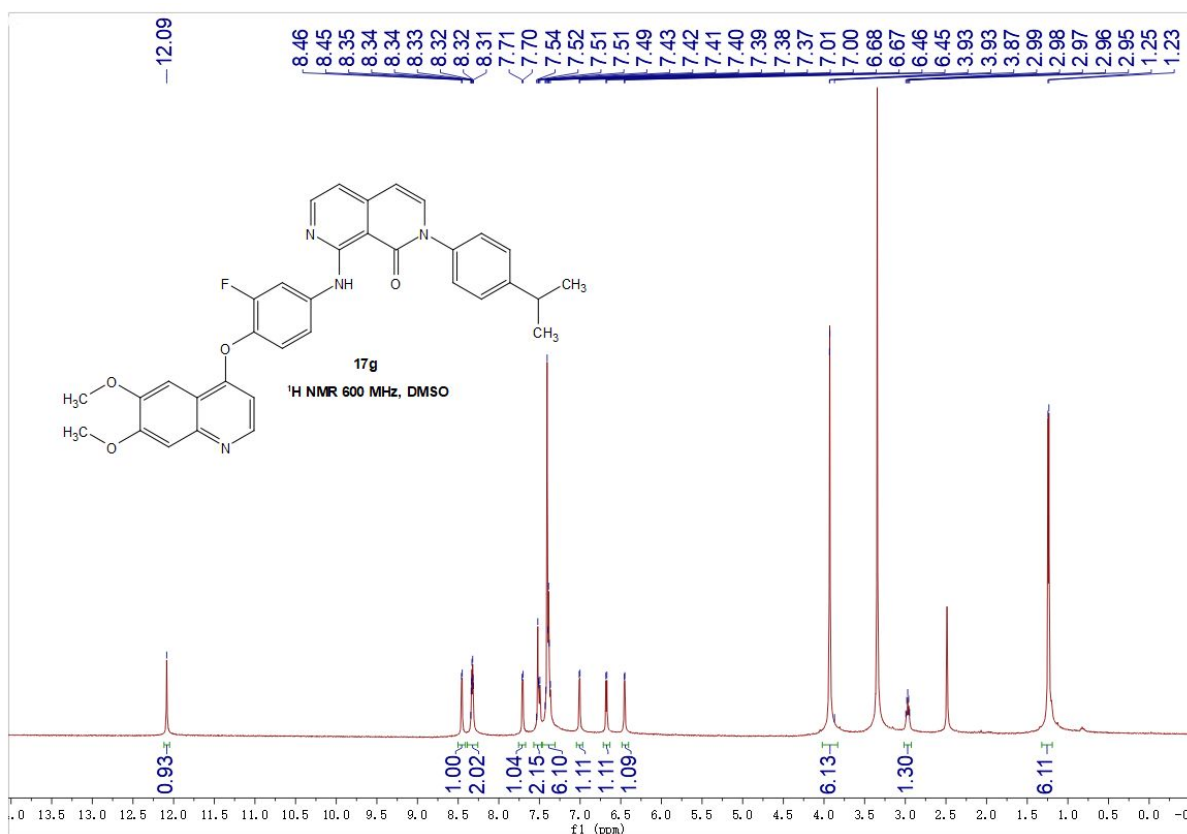

Figure S43: 600 MHz spectrum of <sup>1</sup>H-NMR of compound **17g** (DMSO-*d*<sub>6</sub>)

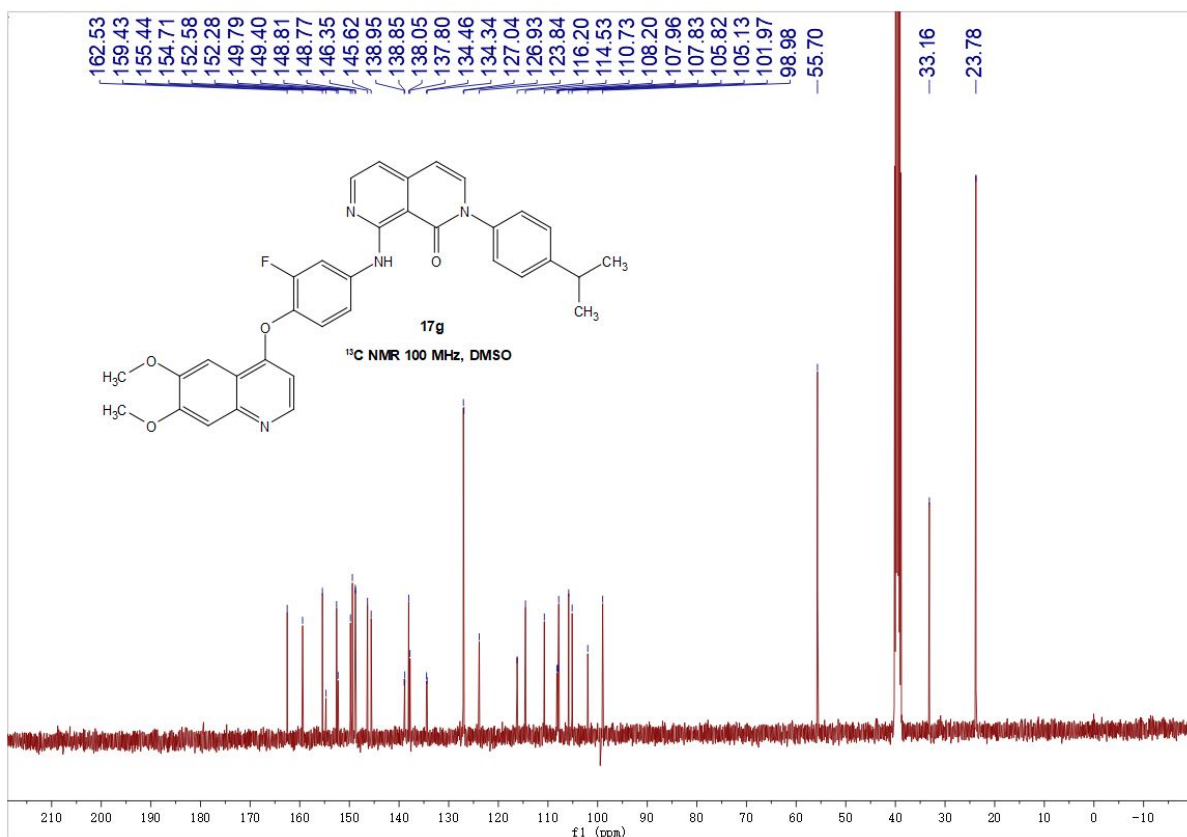

Figure S44: 100 MHz spectrum of <sup>13</sup>C-NMR of compound **17g** (DMSO-*d*<sub>6</sub>)



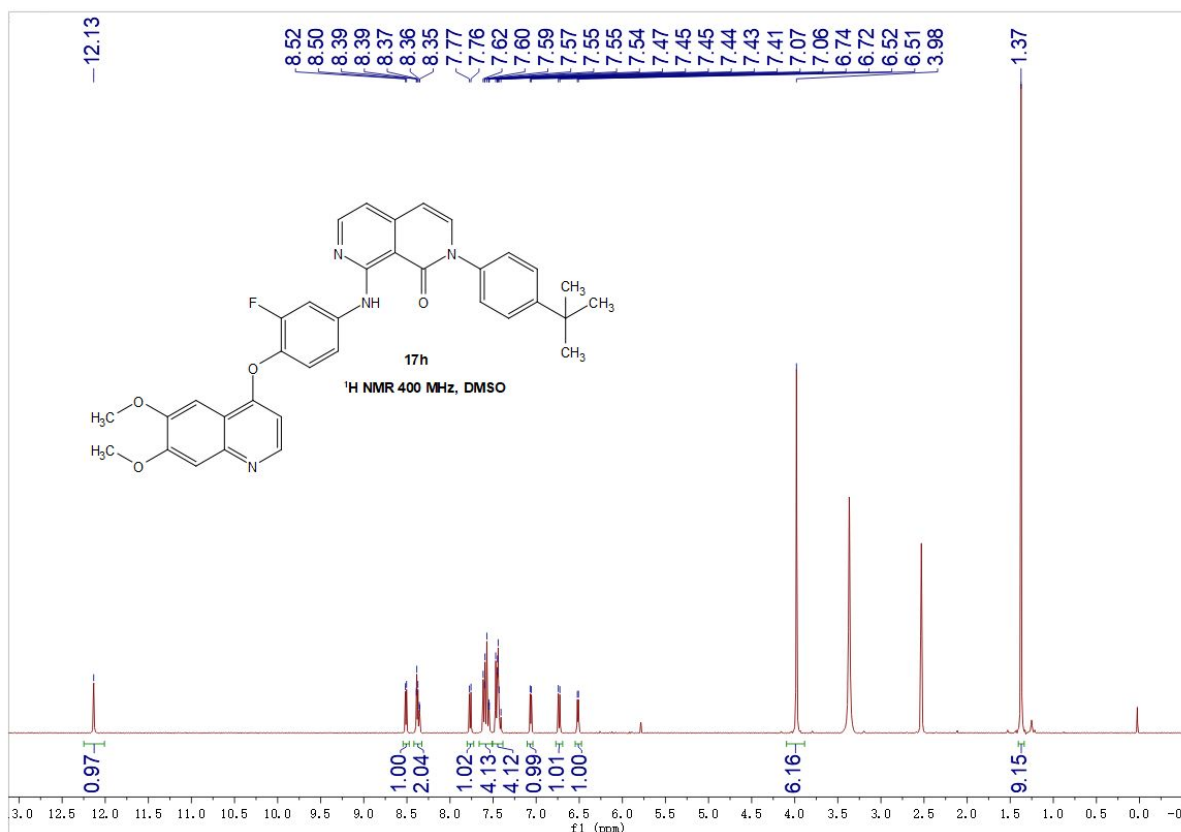

Figure S45: 400 MHz spectrum of <sup>1</sup>H-NMR of compound **17h** (DMSO-*d*<sub>6</sub>)

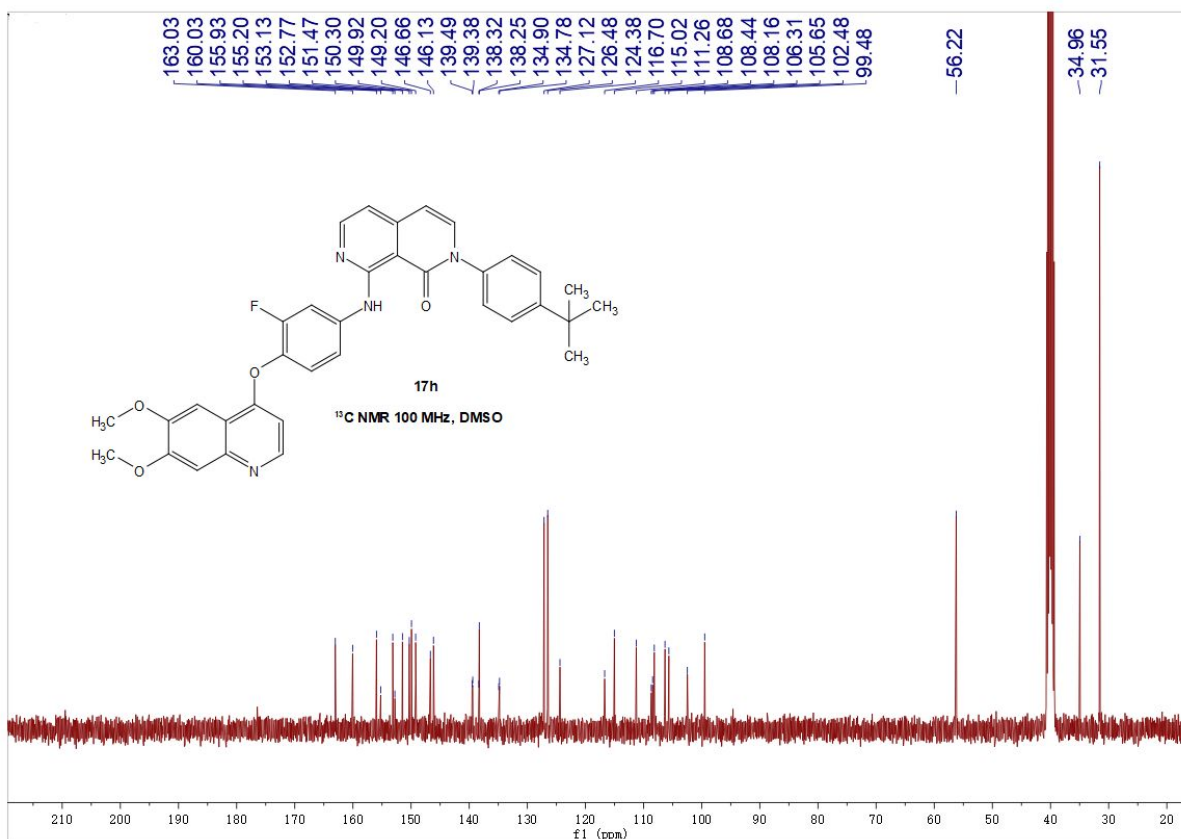

Figure S46: 100 MHz spectrum of <sup>13</sup>C-NMR of compound **17h** (DMSO-*d*<sub>6</sub>)

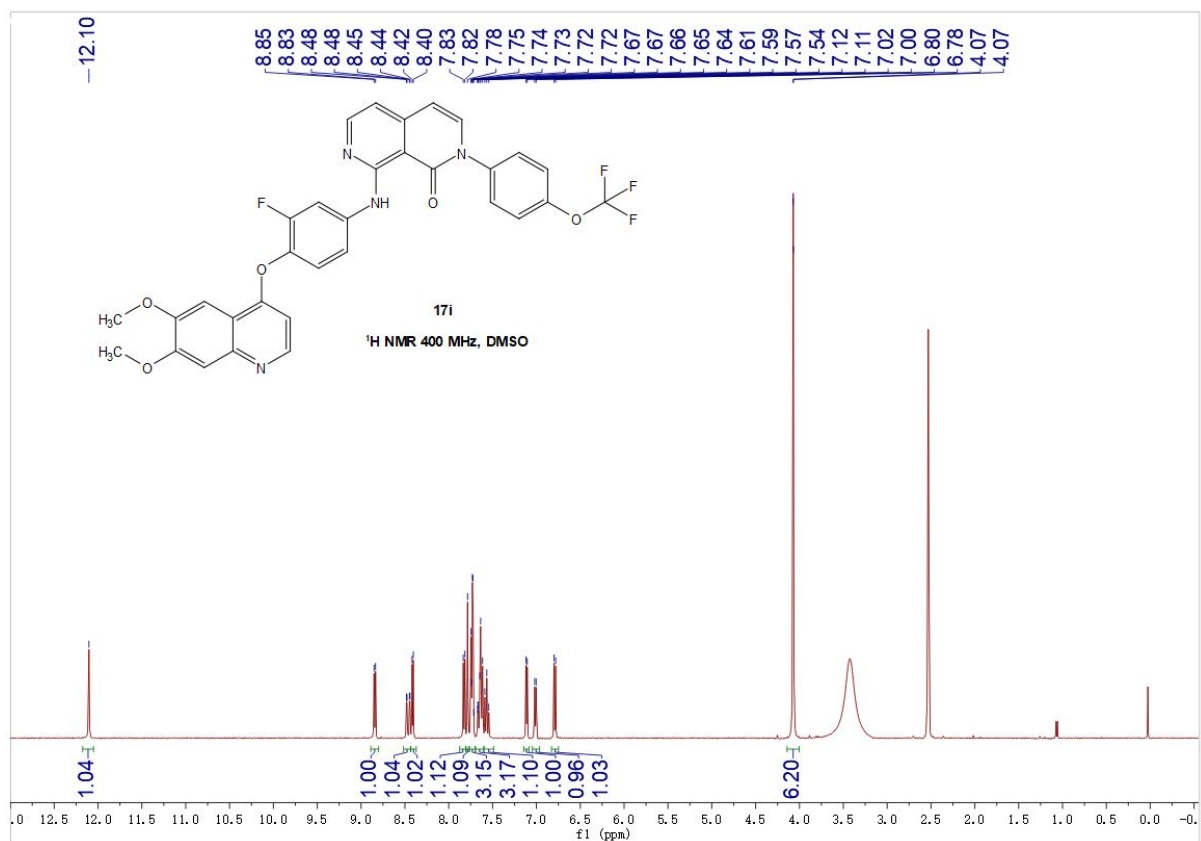

Figure S47: 400 MHz spectrum of <sup>1</sup>H-NMR of compound **17i** (DMSO-*d*<sub>6</sub>)

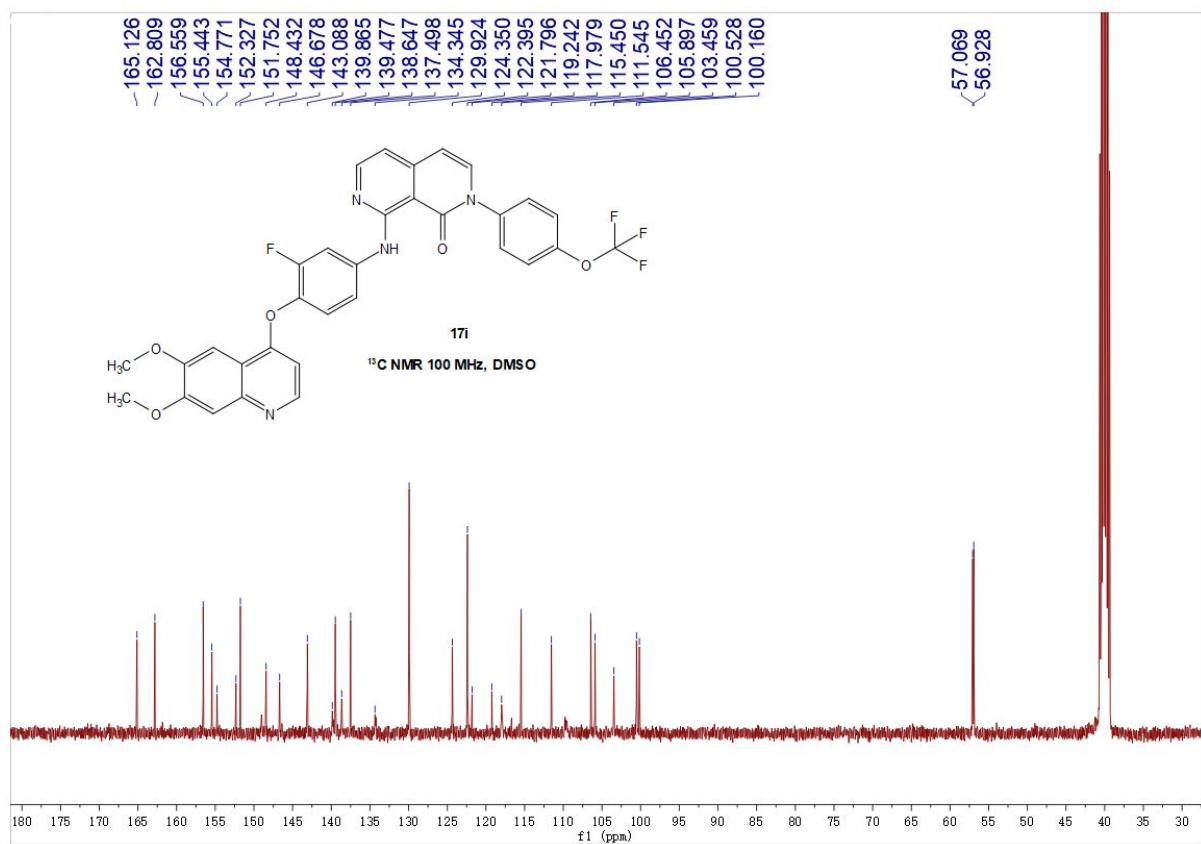

Figure S48: 100 MHz spectrum of <sup>13</sup>C-NMR of compound **17i** (DMSO-*d*<sub>6</sub>)

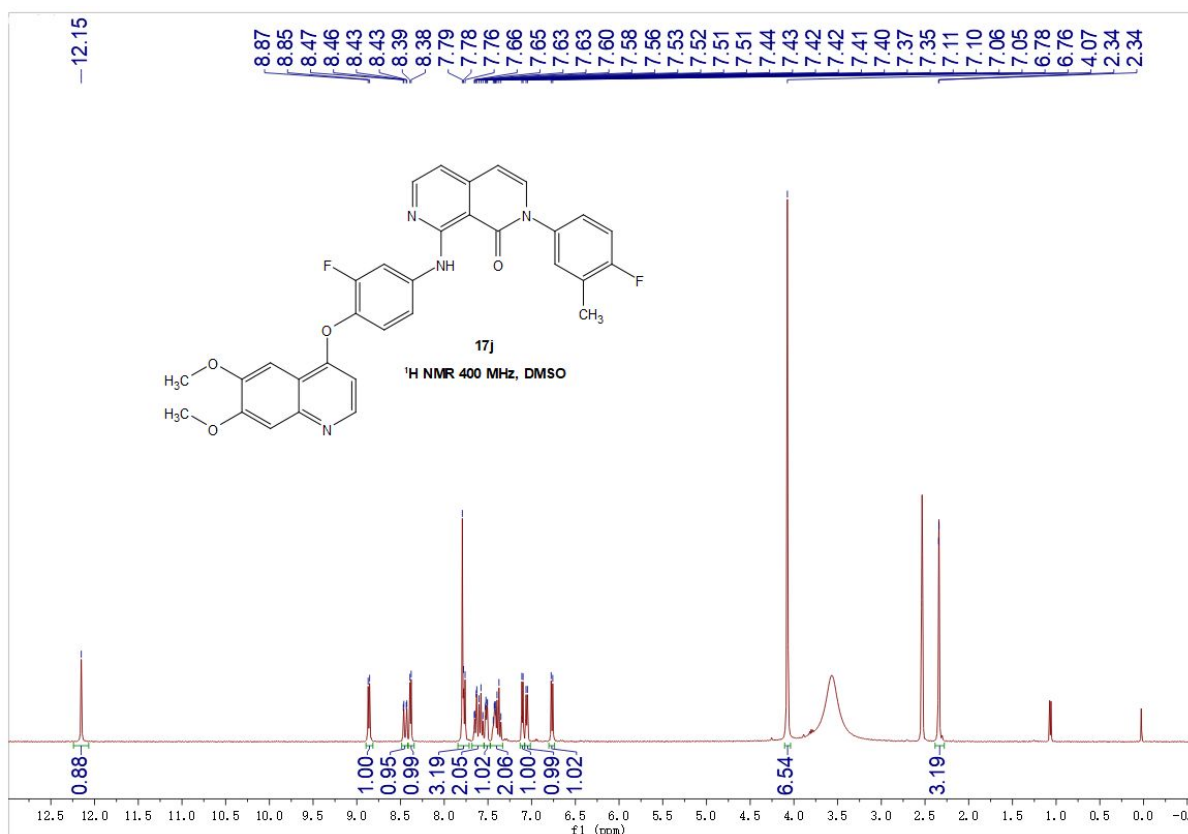

Figure S49: 400 MHz spectrum of <sup>1</sup>H-NMR of compound **17j** (DMSO-*d*<sub>6</sub>)

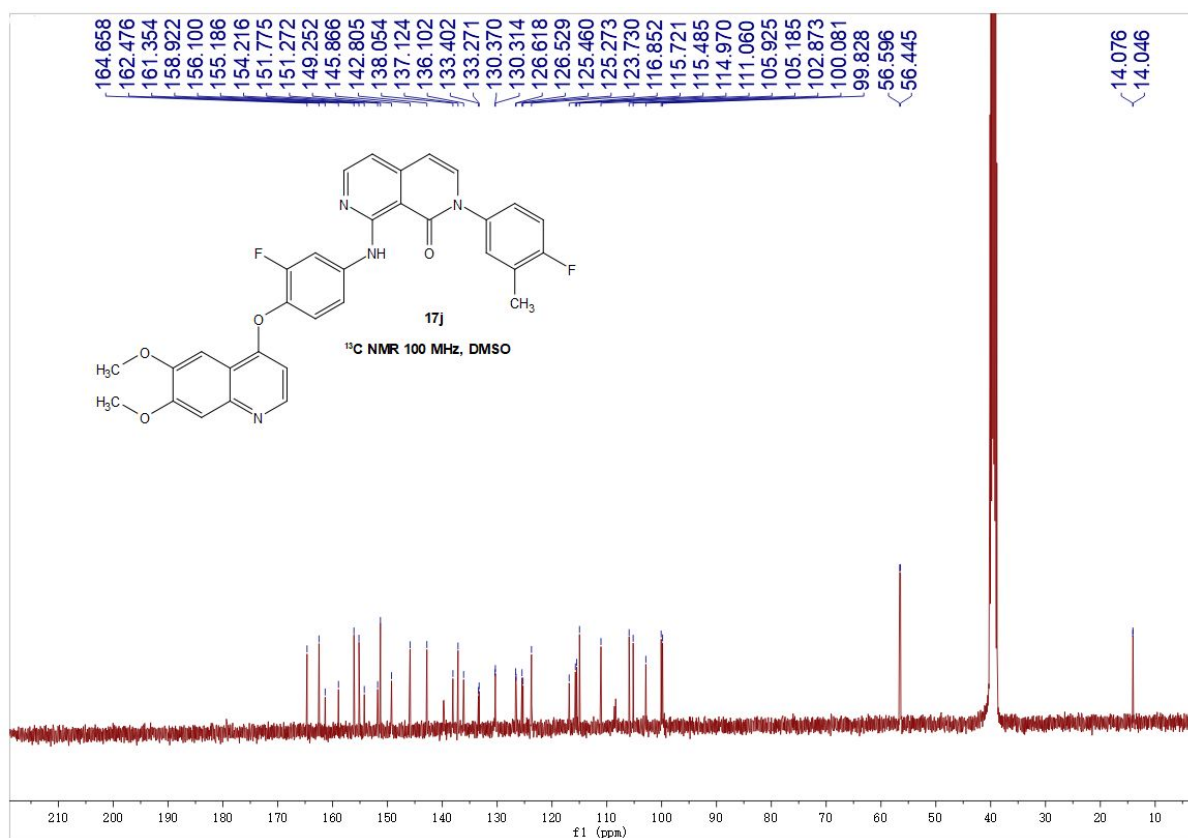

Figure S50: 100 MHz spectrum of <sup>13</sup>C-NMR of compound **17j** (DMSO-*d*<sub>6</sub>)

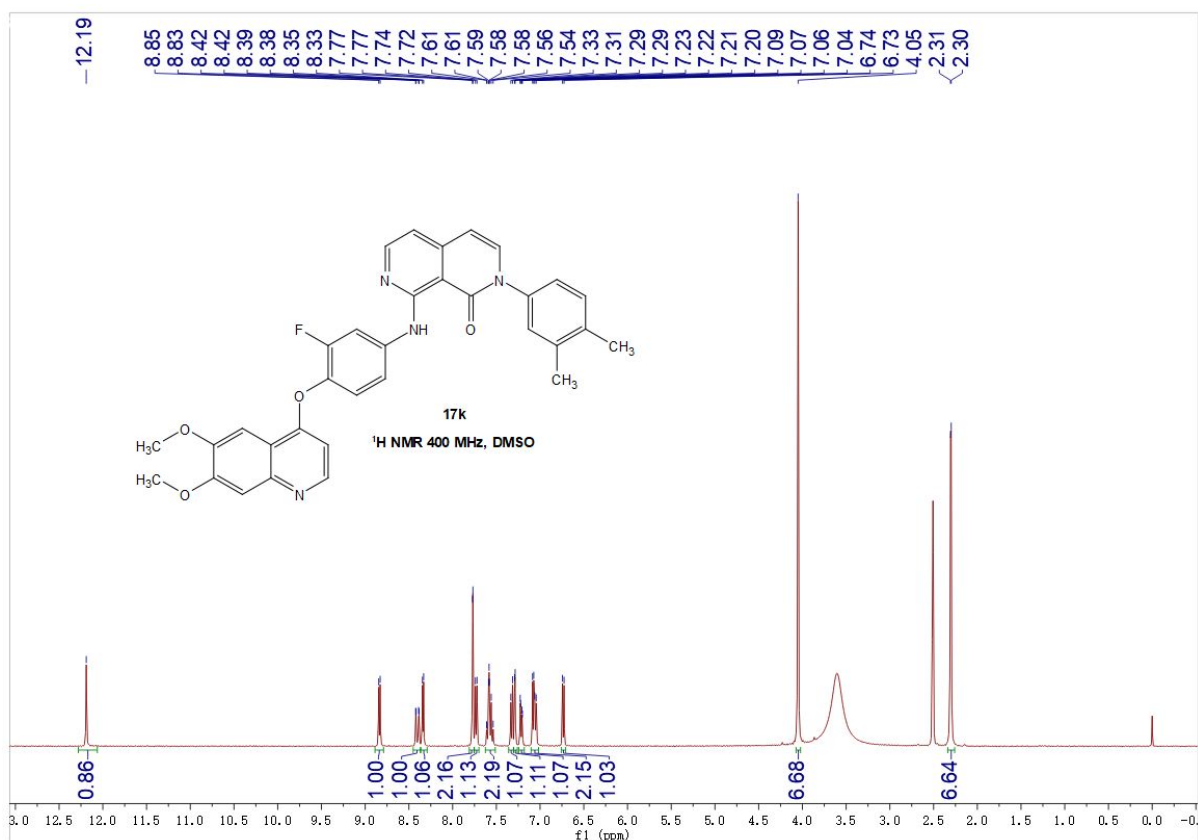

Figure S51: 400 MHz spectrum of <sup>1</sup>H-NMR of compound **17k** (DMSO-*d*<sub>6</sub>)

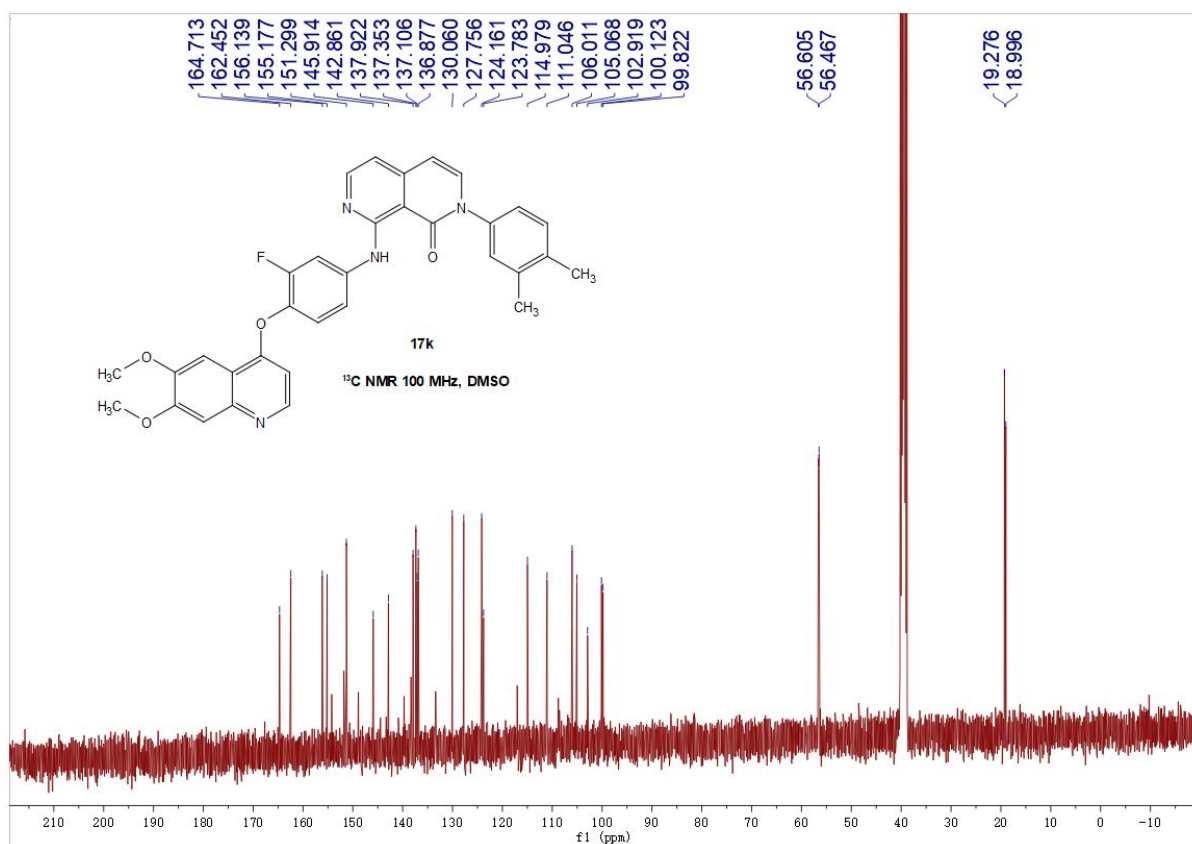

Figure S52: 100 MHz spectrum of <sup>13</sup>C-NMR of compound **17k** (DMSO-*d*<sub>6</sub>)
